# Supplementary material for: MAP4K family kinases act in parallel to MST1/2 to activate LATS1/2 in the Hippo pathway
Source: PubMed Central journal article supplement (PMC4600732; doi:10.1038/ncomms9357), 2015-10-05
Supplement: ncomms9357-s1.pdf [file ncomms9357-s1.pdf]

## Supplementary fig. 1.

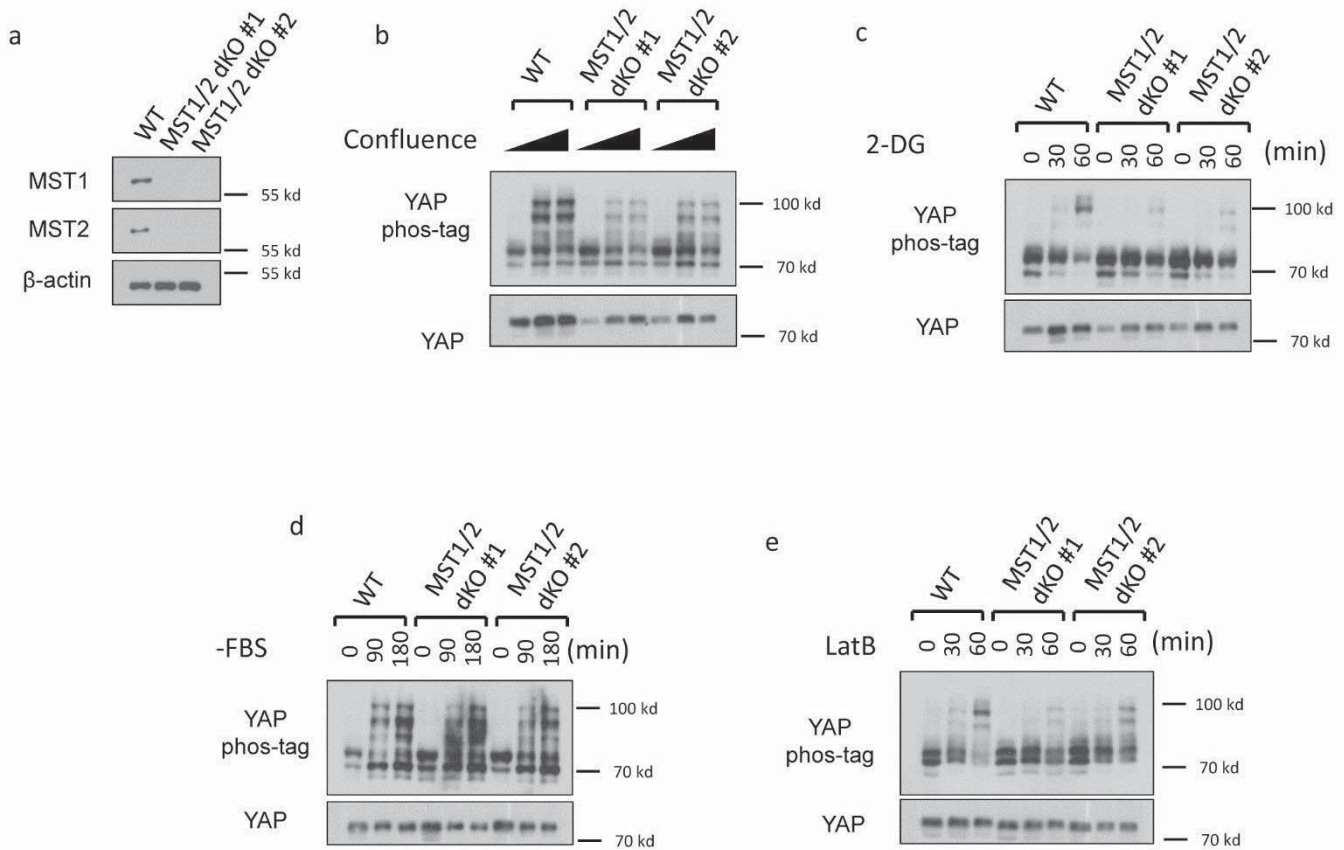

### Supplementary fig. 1. Related to Figure 1. MST1/2 are not required for YAP regulation by upstream signals in U2OS cells.

- Deletion of MST1/2 in U2OS cells.
- Contact inhibition-induced YAP phosphorylation.  $1.5 \times 10^5$ ,  $6 \times 10^5$ , and  $8 \times 10^5$  U2OS Cells per well were seeded onto 6-well plates. The cells were harvested for immunoblot 24 hours later.
- 2-DG induced YAP phosphorylation. Cells at low confluence were treated with 25 mM 2-DG for 30 or 60 minutes.
- Serum depletion-induced YAP phosphorylation. U2OS cells at low confluence were incubated with serum-free culture medium for 1.5 or 3.0 hours.
- Latrunculin B (LatB)-mediated YAP phosphorylation. Cells at low confluence were treated with 0.2  $\mu$ g/ml LatB for 30 or 60 minutes.

## Supplementary fig. 2.

a

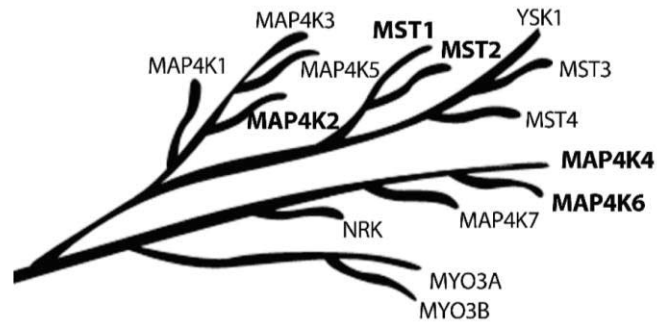

b

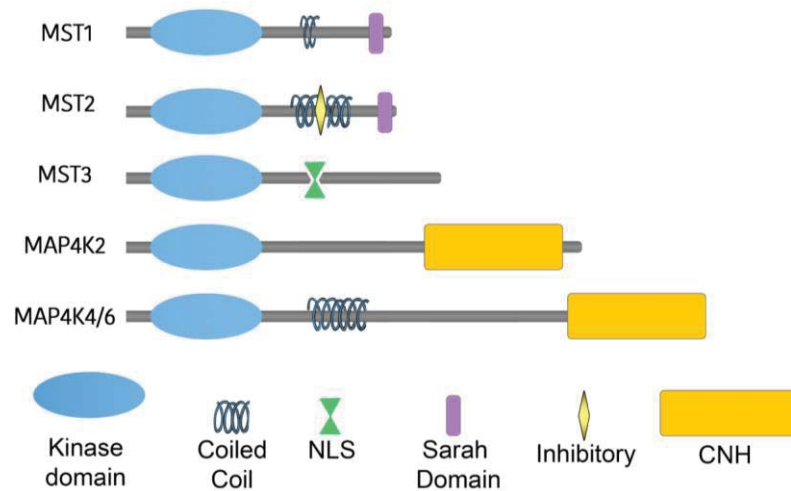

**Supplementary fig. 2. Related to Figure 2. MAP4Ks are structurally related to MST1/2 and interact with LAT1/2.**

(a) The branch of the human kinome tree where MST1/2 and MAP4K2/4/6 are located.

(b) Protein structures of MST1/2/3, MAP4K2, and MAP4K4/6. NLS, nuclear localization signal. CNH, citron homology domain.

### Supplementary fig. 3.

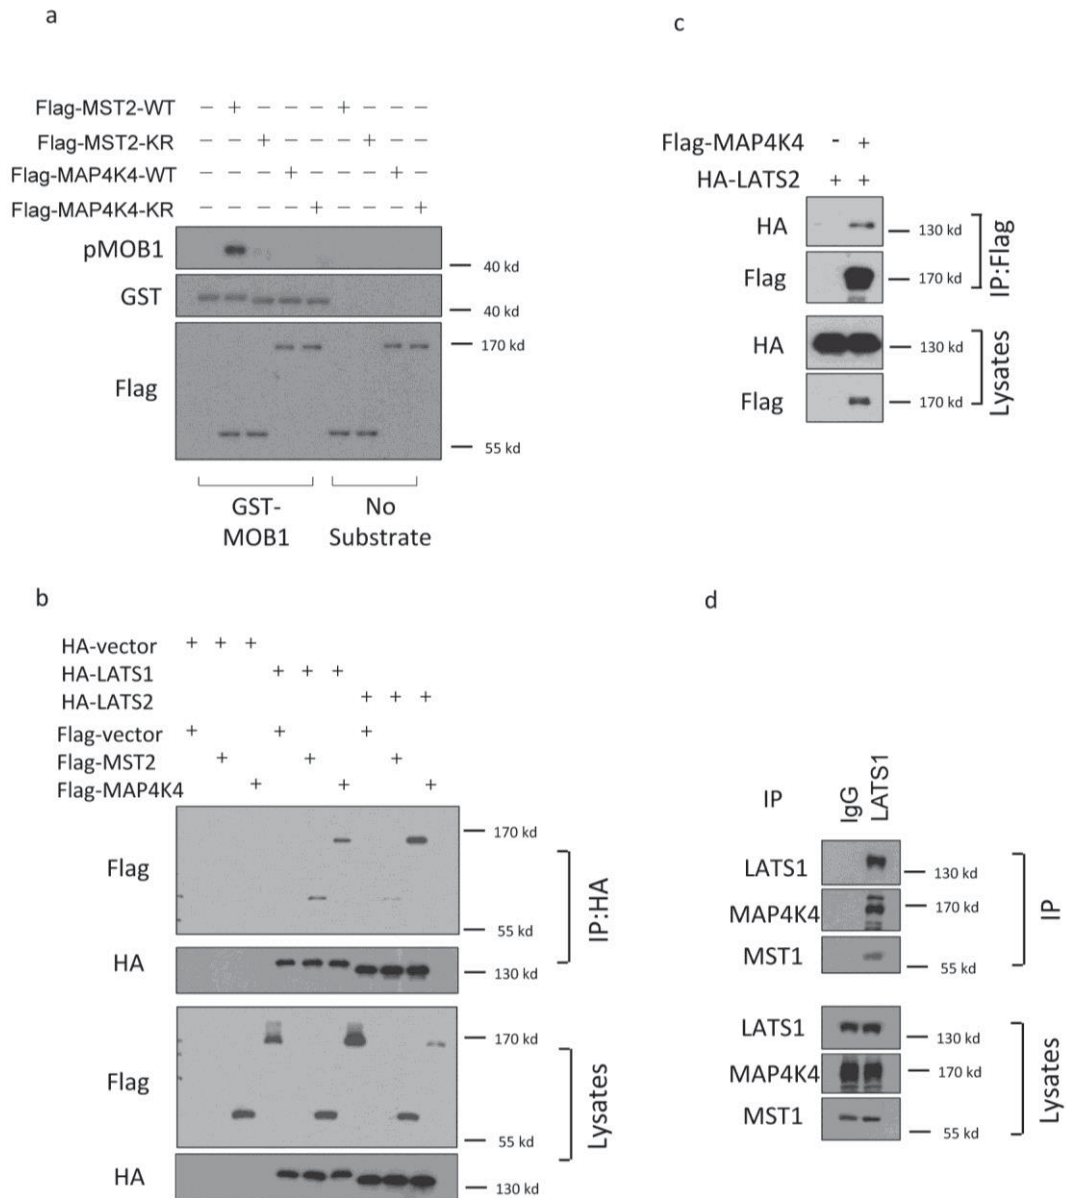

### Supplementary fig. 3. Related to Figure 2. MAP4K4 is a specific kinase for LATS1/2.

- (a) MAP4K4 does not significantly phosphorylate MOB1. Flag-tagged MST2 and MAP4K4 were expressed and purified from HEK293A cells. GST-tagged MOB1 was purified from E coli.
- (b) Interaction of MAP4K4 and LATS1/2 shown by immunoprecipitation of LATS1/2. The plasmids for HA-tagged LATS1 or LATS2, and Flag-tagged MST2 or MAP4K4 were transfected into HEK293A cells. HA antibodies were used to immunoprecipitate HA-LATS1/2.
- (c) Interaction of MAP4K4 and LATS2 shown by immunoprecipitation of MAP4K4. The plasmids Flag-tagged MAP4K4 and HA-tagged LATS2 were co-transfected into HEK293A cells. Flag antibodies were used for immunoprecipitation.
- (d) Interaction of endogenous LATS1 and MAP4K4. LATS1 antibody and rabbit IgG were used for immunoprecipitation of HEK293A cell lysates.

## Supplementary fig. 4.

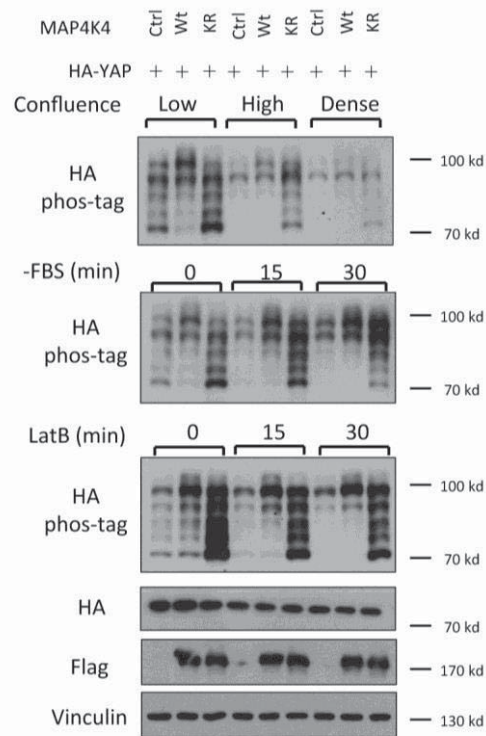

### Supplementary fig. 4. Related to Figure 3. MAP4K4 induces YAP phosphorylation while its dominant-negative form promotes YAP dephosphorylation.

The Kinase dead mutant (KR) and wild-type (WT) MAP4K4 plasmids were transfected to HEK293A cells. 6 hours after transfection, the cells were split and seeded for testing effects of different conditions on YAP phosphorylation, including high cell density, serum deprivation, and LatB treatment.



## Supplementary fig. 5.

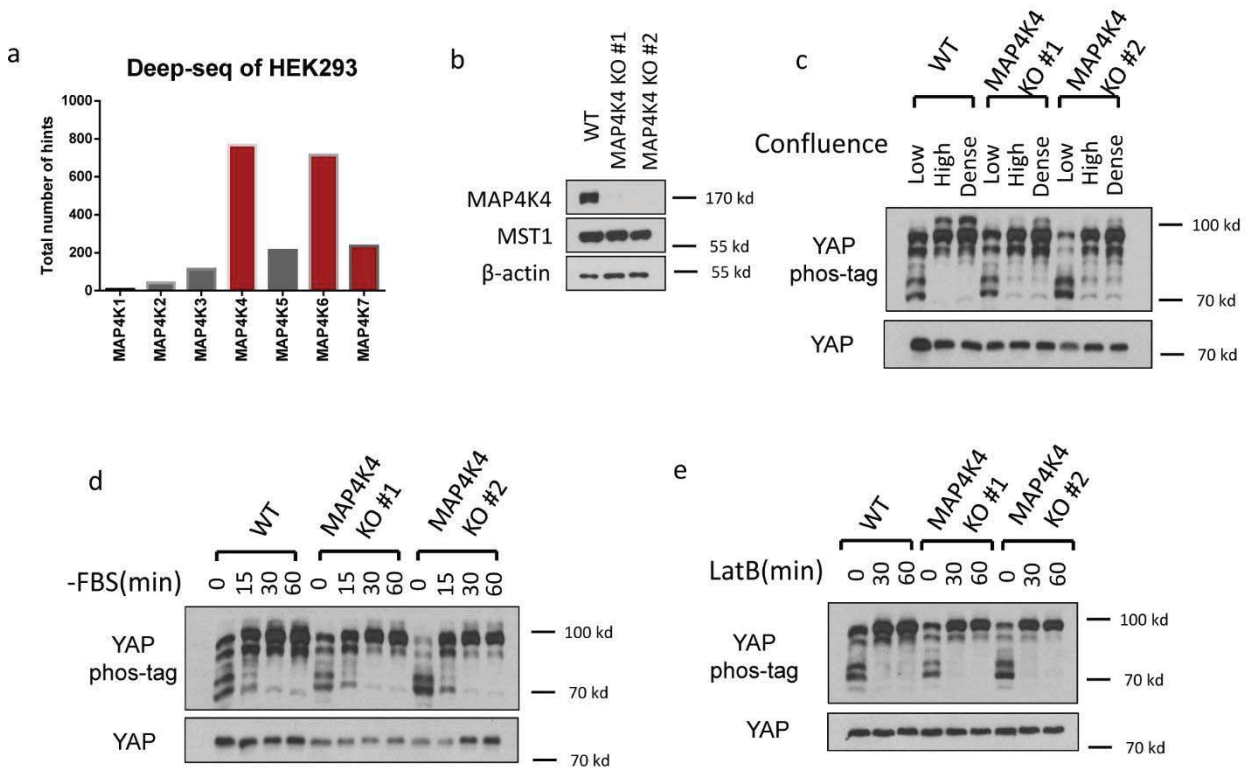

### Supplementary fig. 5. Related to Figure 4. Deleting MAP4K4 alone is not sufficient to compromise any YAP phosphorylation signals.

- The RNA abundance of MAP4Ks based on a deep sequencing of HEK293A cells (Ref 35).
- Deletion of MAP4K4 in the HEK293A cells. Two independent clones (#1 and #2) are shown.
- Contact inhibition-induced YAP phosphorylation in two different clones of MAP4K4 KO cells.
- Serum deprivation-induced YAP phosphorylation in MAP4K4 KO cells.
- Actin depolymerization-induced YAP phosphorylation in MAP4K4 KO cells.

## Supplementary fig. 6.

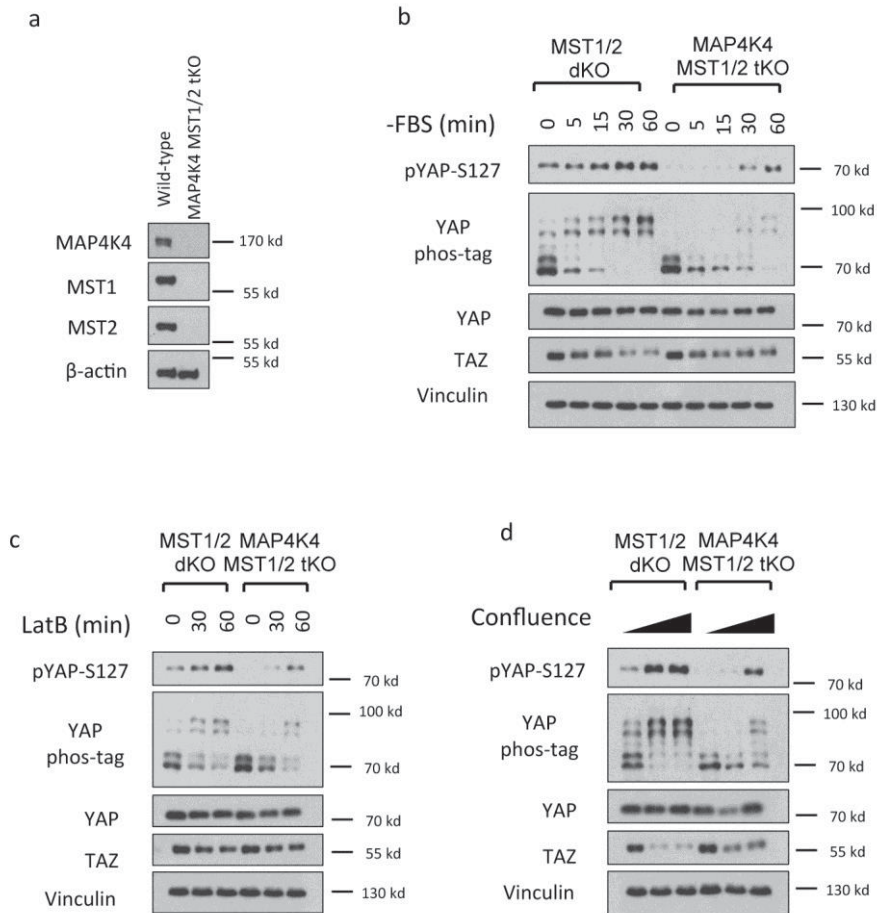

### Supplementary fig. 6. Related to Figure 5. Deletion of MAP4K4 in MST1/2-dKO cells decreases and delays YAP phosphorylation induced by various signals.

- (a) Deletion of MAP4K4 in MST1/2-dKO HEK293A cells.
- (b) Decreased YAP phosphorylation from serum deprivation by deletion of MAP4K4 in MST1/2 dKO cells.
- (c) Deletion of MAP4K4 further lowers the responsiveness of YAP phosphorylation to LatB in MST1/2 dKO cells.
- (d) Deletion of MAP4K4 antagonizes contact inhibition-induced YAP phosphorylation and TAZ degradation.

## Supplementary fig. 7.

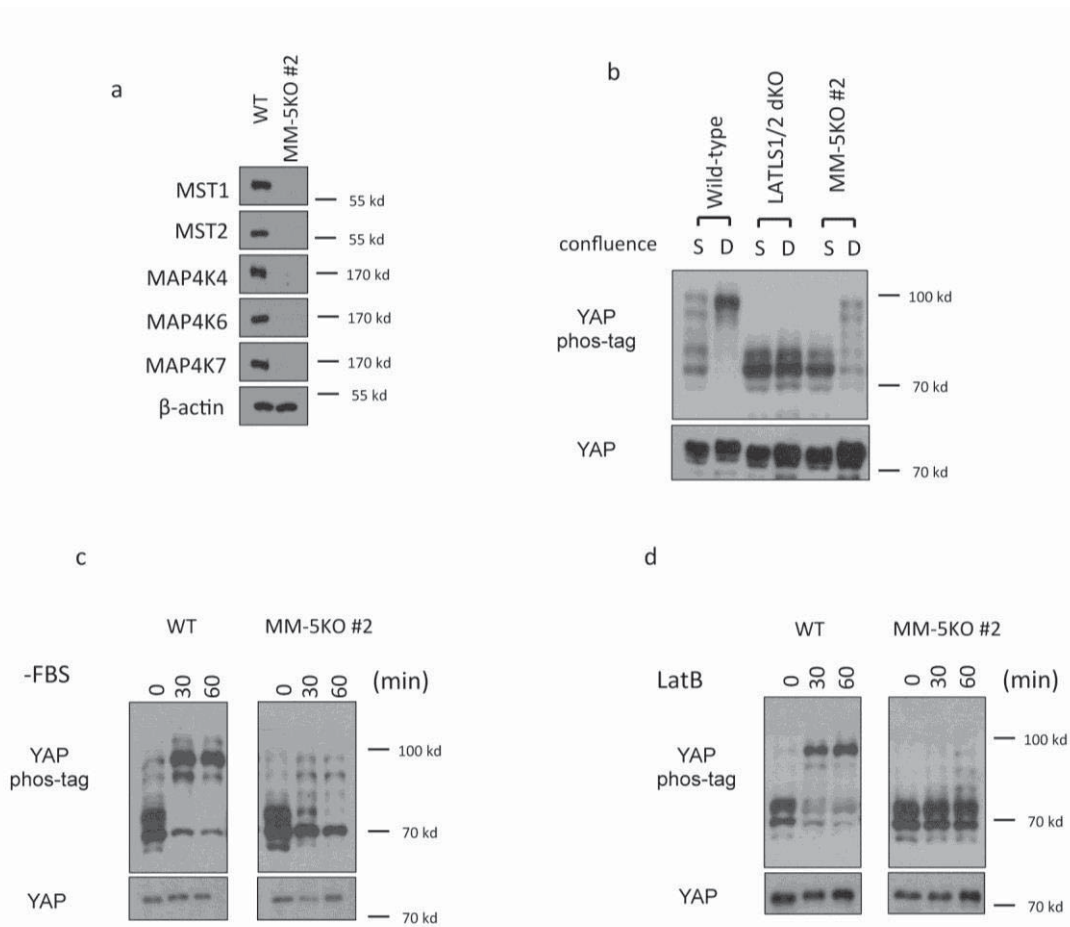

### Supplementary fig. 7. Related to Figure 5. Another clone with deletion of MST1/2 and MAP4K4/6/7 shows similar responses to various upstream signals.

- A separate clone with deletion of MST1/2 and MAP4K4/6/7 using different sgRNAs for each of MAP4K4/6/7 in HEK293A cells.
- Contact inhibition-induced LATS and YAP phosphorylation is significantly compromised in the second clone of MM-5KO HEK293A cells. The experiments were performed along with the samples in Figure 5b in the same phos-tag gel. Therefore, the wild-type control cells were omitted.
- Serum deprivation-induced LATS and YAP phosphorylation is largely blocked in MM-5KO HEK293A cells.
- Actin depolymerization-induced LATS but not YAP phosphorylation is largely blocked in MM-5KO HEK293A cells.

## Supplementary fig. 8.

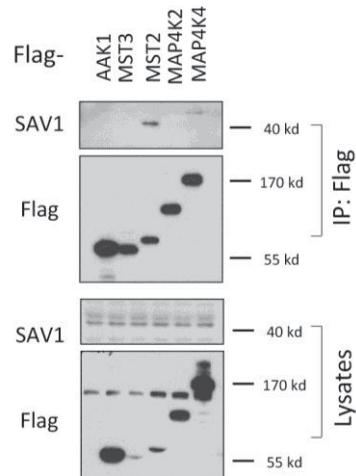

### Supplementary fig. 8. Related to Figure 6. MAP4K2/4 does not interact with SAV1.

Flag-tagged kinase constructs were transfected into HEK293A cells. Cell lysate was used for immunoprecipitation with anti-Flag antibody. The immunoprecipitates were subjected to Western blot analyses with SAV1 antibody.

# Supplementary fig. 9.

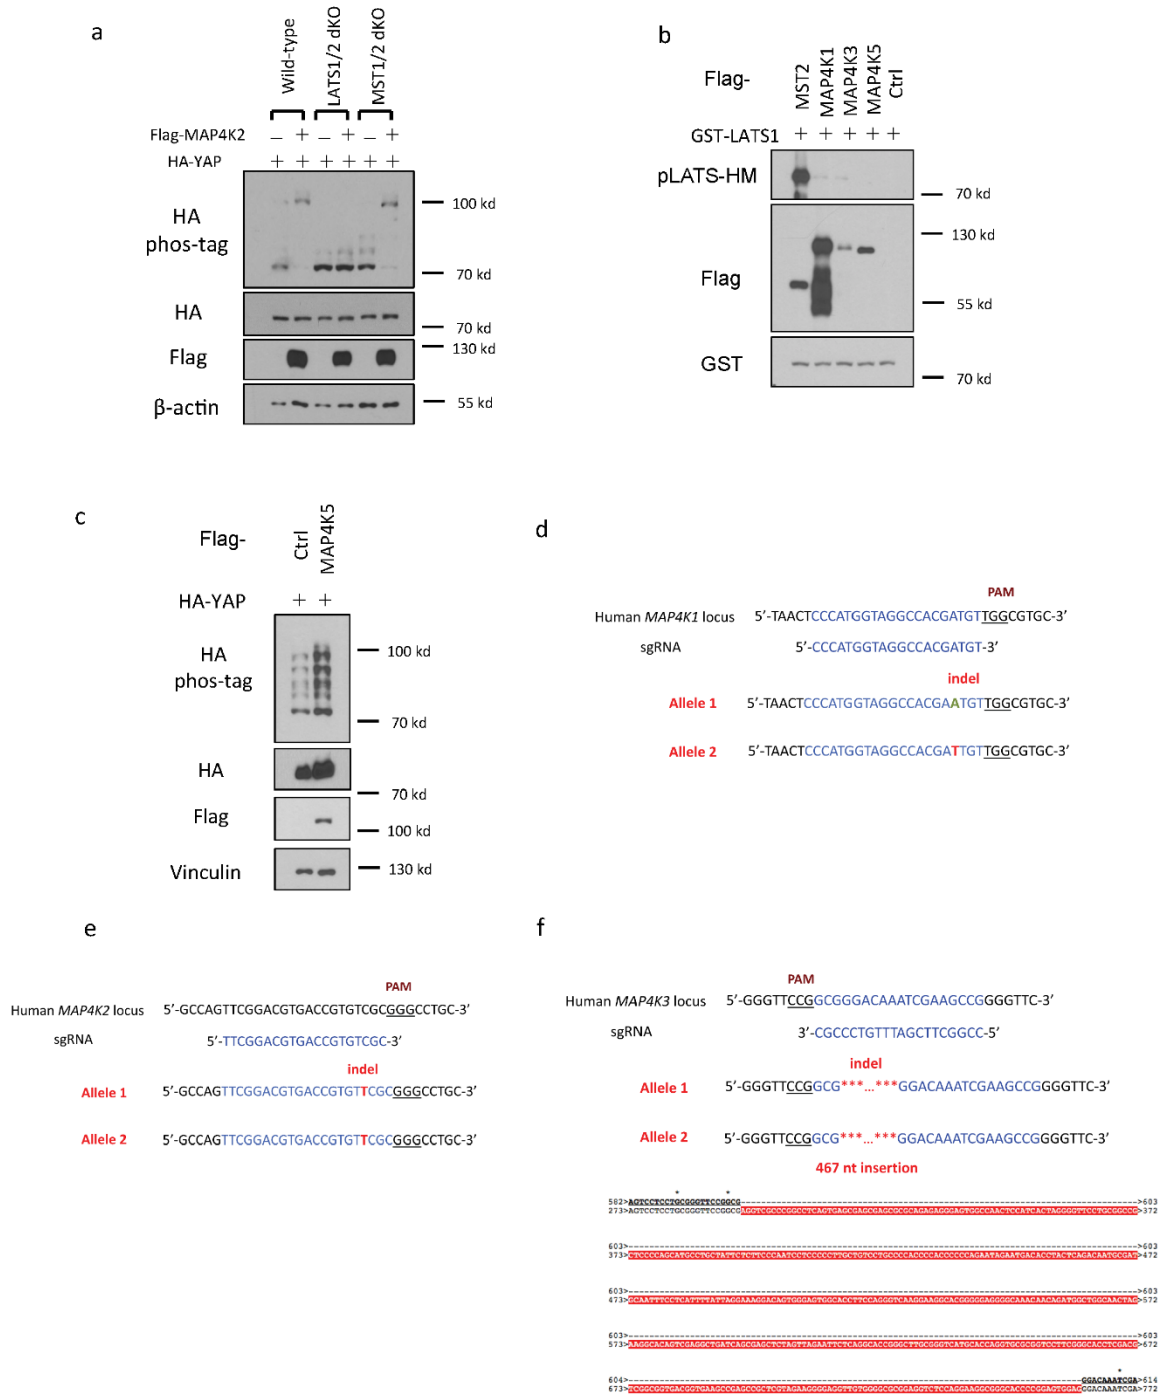

**Supplementary fig. 9. Related to Figure 7. MAP4K1/2/3 are also kinases for LATS and induce YAP phosphorylation.**

- (a) MAP4K2 induces YAP phosphorylation in a LATS1/2 dependent but MST1/2 independent manner.
- (b) MAP4K1 and MAP4K3 show very weak kinase activities toward LATS.
- (c) MAP4K5 is not able to induce YAP phosphorylation.
- (d) The DNA mutation MAP4K1 in the clone of the MST1/2 MAP4K1/2/3/4/6/7 8 gene knockout (MM-8KO) cells shown in Figure S7c.
- (e) The DNA mutation MAP4K2 in the clone of the MST1/2 MAP4K1/2/3/4/6/7 8 gene knockout cells shown in Figure S7c.
- (f) The DNA mutation MAP4K3 in the clone of the MST1/2 MAP4K1/2/3/4/6/7 8 gene knockout cells shown in Figure S7c.

## Supplementary fig. 10.

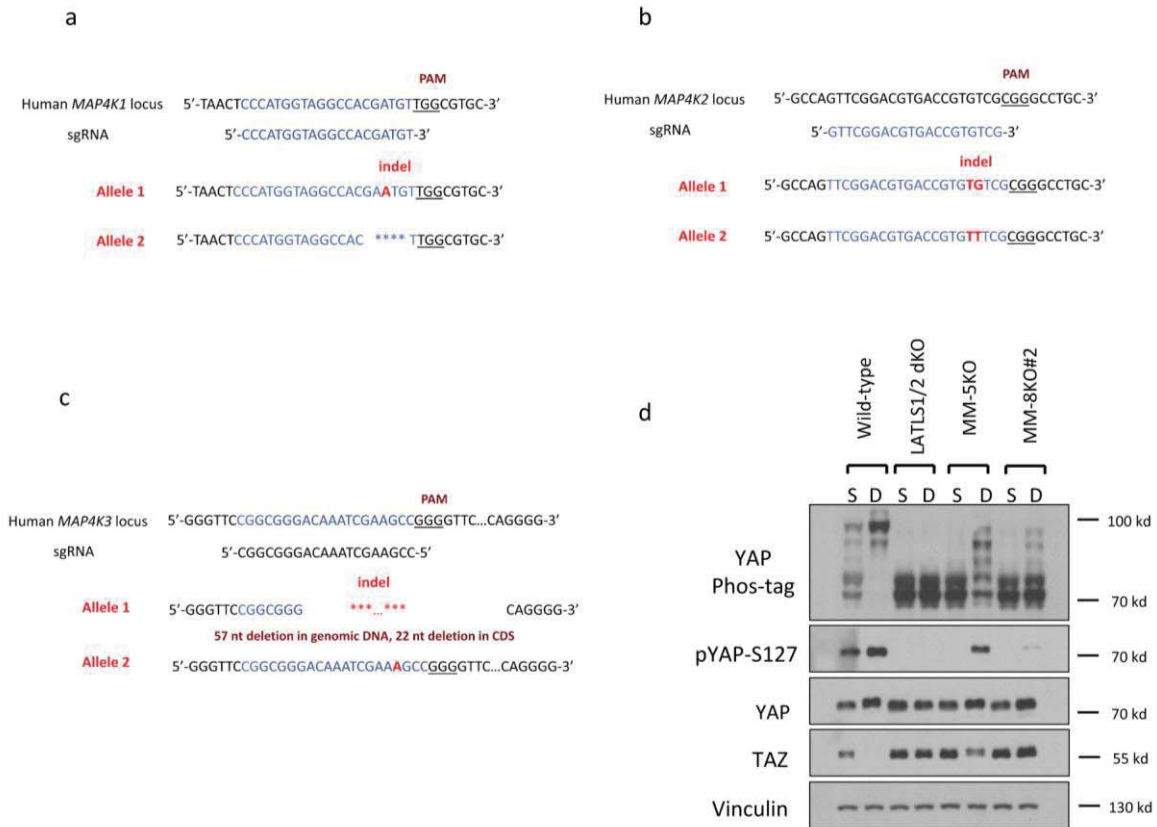

### Supplementary fig. 10. Related to Figure 7. A second clone with deletion of *MST1/2* and *MAP4K1/2/3/4/6/7* showed further decreased YAP phosphorylation.

- The DNA mutation *MAP4K1* in another clone of the *MST1/2* *MAP4K1/2/3/4/6/7* 8 gene knockout (MM-8KO) cells.
- The DNA mutation *MAP4K2* in the second clone of the *MST1/2* *MAP4K1/2/3/4/6/7* 8 gene knockout cells.
- The DNA mutation *MAP4K3* in the second clone of the *MST1/2* *MAP4K1/2/3/4/6/7* 8 gene knockout cells.
- YAP phosphorylation is further decreased by deletion of *MAP4K1/2/3* in MM-5KO cells as shown in the second clone of MM-8KO cells.



## Supplementary fig. 11.

Group1: 1-21

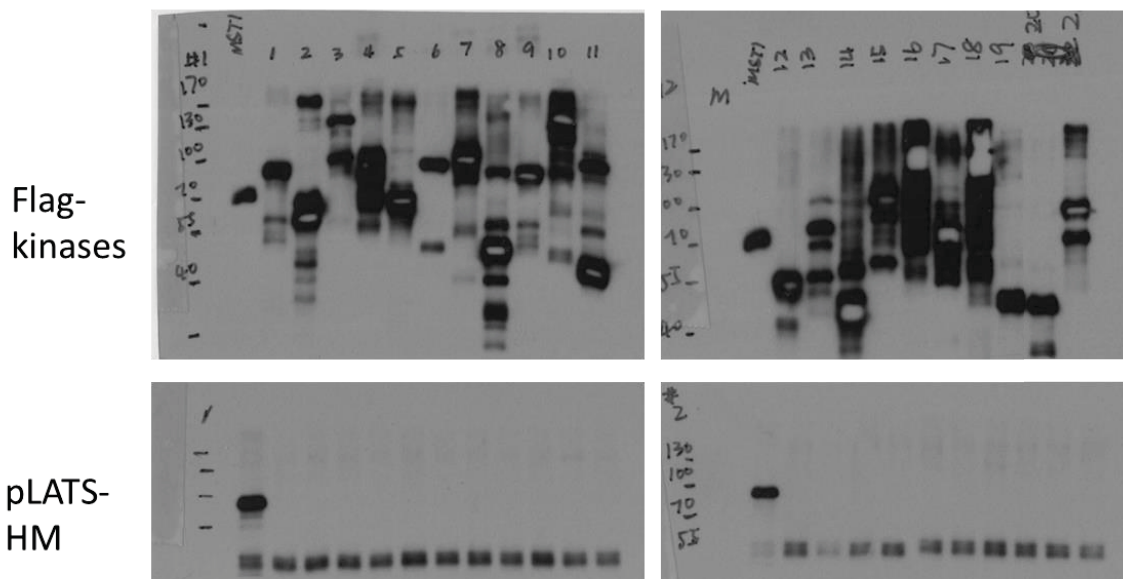

|    |                  |    |                   |
|----|------------------|----|-------------------|
| 1  | ARAF             | 12 | PSKH2             |
| 2  | AKT3 (isoform 2) | 13 | PINK1             |
| 3  | PKN2             | 14 | MAPK7 (isoform 1) |
| 4  | AMHR2            | 15 | TNK1              |
| 5  | FYN              | 16 | AXL               |
| 6  | RIPK1            | 17 | TNK2              |
| 7  | LIMK2            | 18 | FGFR3             |
| 8  | CDK9             | 19 | CDC2L5            |
| 9  | ARAF             | 20 | PFTK2             |
| 10 | TIE1             | 21 | ITK               |
| 11 | CDC2L1           |    |                   |

### Supplementary fig. 11-18. Related to Figure 2. Identification of MST1/2-independent LATS-activating kinases.

A human kinome library of kinase-expressing constructs is used for expression in HEK293A cells and purification of kinases by immunoprecipitation. The purified kinases are applied to the truncated LATS1 recombinant proteins for in vitro kinase assays. The phosphorylation of LATS1 is detected by immunoblotting with an antibody targeting the hydrophobic motif of the LATS1 kinase domain (pLATS1-T1079).

Group1: 22-40

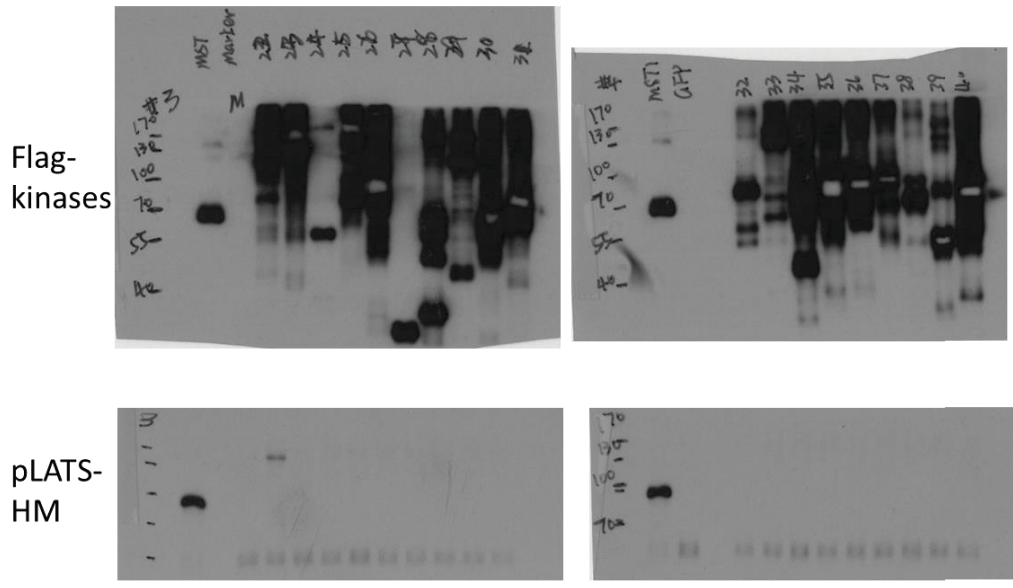

- |    |                   |    |                   |
|----|-------------------|----|-------------------|
| 22 | DSTYK (isoform 2) | 32 | JAK3              |
| 23 | FGFR1             | 33 | NPR2              |
| 24 | PSKH1             | 34 | MOS               |
| 25 | INSRR             | 35 | HCK               |
| 26 | IRAK2             | 36 | NEK11 (isoform 3) |
| 27 | RAGE              | 37 | GRK4              |
| 28 | PRKACB            | 38 | FASTK             |
| 29 | FER               | 39 | MYLK4             |
| 30 | STK11             | 40 | DYRK4             |
| 31 | TESK2             |    |                   |

Group1: 41-65

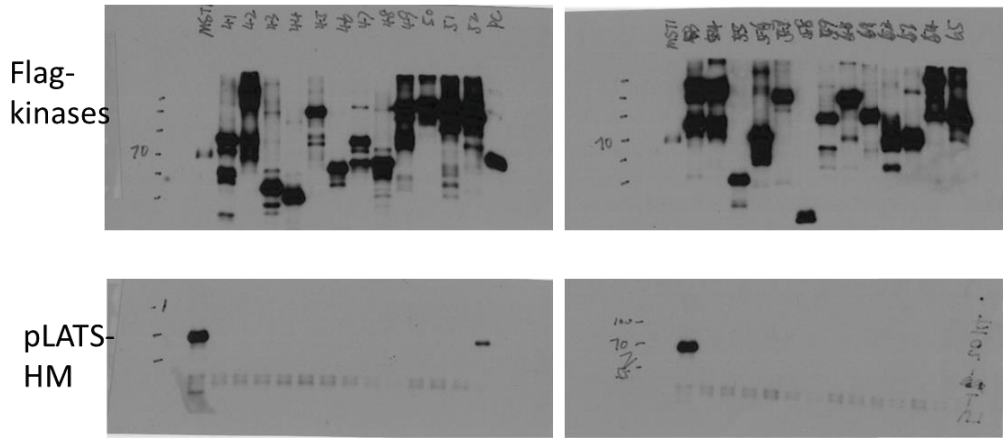

- |    |        |    |                     |
|----|--------|----|---------------------|
| 41 | RAF1   | 53 | ABL1                |
| 42 | FLT4   | 54 | DDR2                |
| 43 | TSSK2  | 55 | ALS2CR7             |
| 44 | PRKY   | 56 | MATK                |
| 45 | KSR2   | 57 | MAST2               |
| 46 | FASTK  | 58 | ULK3                |
| 47 | PRKAA1 | 59 | EIF2AK4 (isoform 3) |
| 48 | WNK1   | 60 | MYLK3               |
| 49 | EPHB6  | 61 | DCLK2               |
| 50 | EPHB1  | 62 | ACVR1C              |
| 51 | NTRK1  | 63 | FRK                 |
| 52 | RIPK5  | 64 | MYO3B               |
|    |        | 65 | DYRK1B              |

Group1: 66-77

Flag-kinases

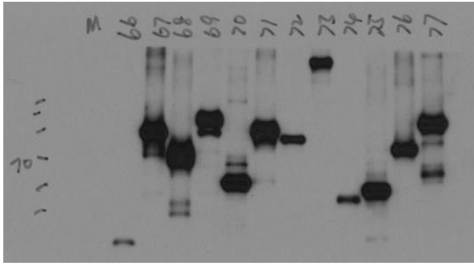

pLATS-HM

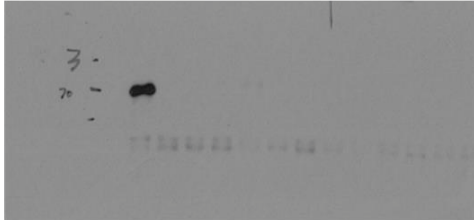

- |    |                 |
|----|-----------------|
| 66 | ICK (isoform 2) |
| 67 | IRAK2           |
| 68 | ACVR1B          |
| 69 | PTK2            |
| 70 | PRKX            |
| 71 | GRK6B           |
| 72 | PRKR            |
| 73 | WNK4            |
| 74 | CDK7            |
| 75 | STYK1           |
| 76 | CLK3 (isoform1) |
| 77 | NEK8            |

## Supplementary fig. 12.

Group 2: 1-23

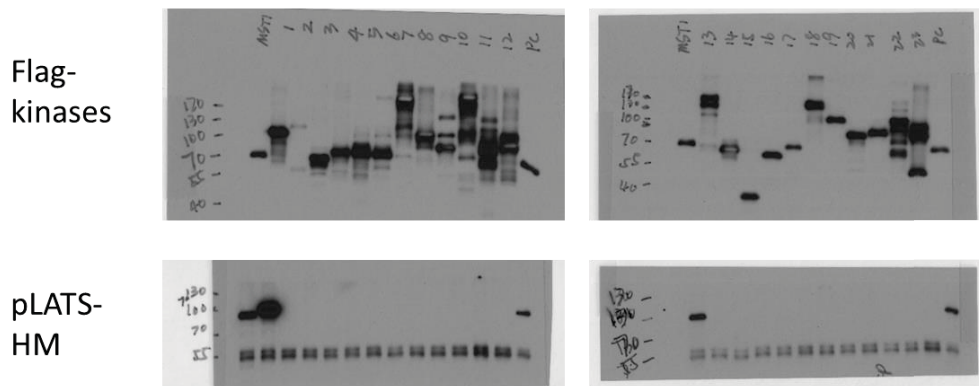

|    |        |    |                    |
|----|--------|----|--------------------|
| 1  | PRKCB  | 13 | NTRK3              |
| 2  | MERTK  | 14 | GSK3A              |
| 3  | PCTK3  | 15 | TSSK6              |
| 4  | LCK    | 16 | MAP2K7 (isoform 4) |
| 5  | EPHB6  | 17 | CLK3 (isoform 3)   |
| 6  | LYN    | 18 | EPHA2              |
| 7  | ERBB2  | 19 | TNNI3K             |
| 8  | HIPK4  | 20 | CAMKK1 (isoform 2) |
| 9  | GRK7   | 21 | TESK1              |
| 10 | ALK    | 22 | DCAMKL2            |
| 11 | HCK    | 23 | PDIK1L             |
| 12 | ACVR2B |    |                    |

Group 2: 24-44

Flag-kinases

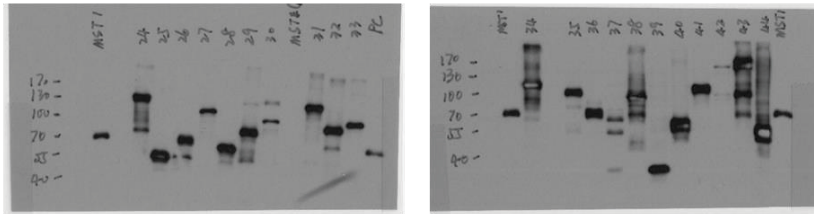

pLATS-HM

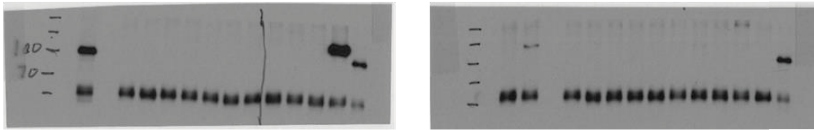

|    |         |    |                    |
|----|---------|----|--------------------|
| 24 | DDR1    | 34 | PRKCE              |
| 25 | SGK2    | 35 | PLK2               |
| 26 | SGK1    | 36 | RIOK               |
| 27 | GSG2    | 37 | PRKACB             |
| 28 | ILK     | 38 | IKBKE              |
| 29 | SRPK3   | 39 | CDK10 (isoform 4)  |
| 30 | EIF2AK4 | 40 | TSSK1B             |
| 31 | PKN1    | 41 | NUAK2              |
| 32 | BTK     | 42 | PIK3R4             |
| 33 | PRKG2   | 43 | CSF1R              |
|    |         | 44 | STK32C (isoform 2) |

Group 2: 49-60

Flag-kinases

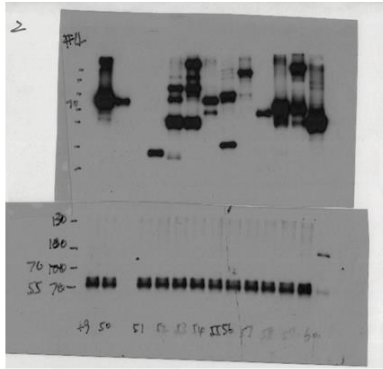

- 49 CAMKV
- 50 MAP3K12
- 51 MAPK15
- 52 NEK2
- 53 ERBB3
- 54 ITK
- 55 CSNK1A1
- 56 TYK2
- 57 CDK8
- 58 BLK
- 59 RET
- 60 CSNK1D (isoform 2)



Group 2: 61-80

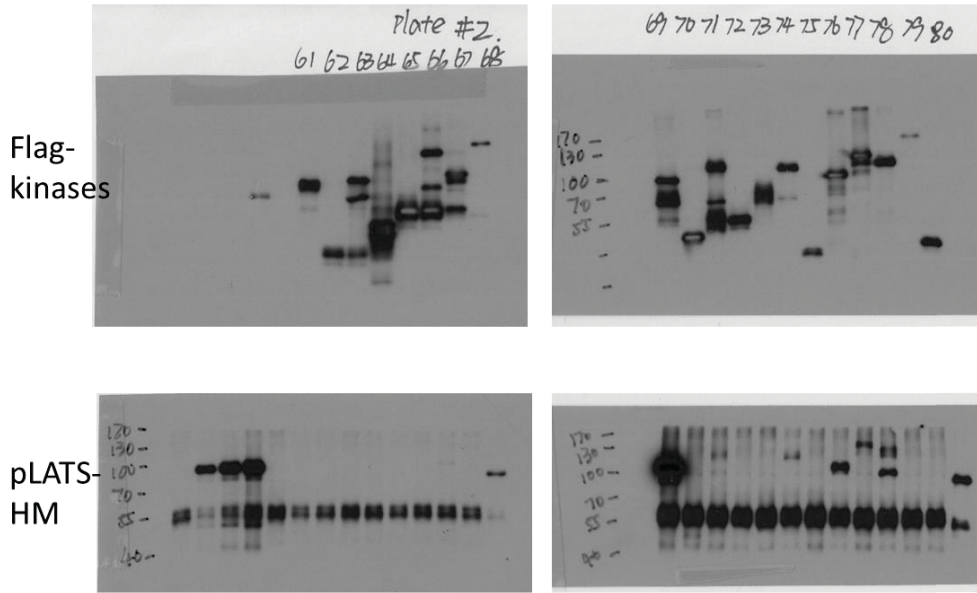

|    |                    |    |                   |
|----|--------------------|----|-------------------|
| 61 | BMPR1A             | 69 | PRKCQ             |
| 62 | NRBP2 (isoform 2)  | 70 | CDK6              |
| 63 | LYN                | 71 | MUSK              |
| 64 | PIM3               | 72 | CSNK1E            |
| 65 | CSNK1D (isoform 1) | 73 | LCK               |
| 66 | STK33              | 74 | KSR               |
| 67 | RPS6KA2            | 75 | TP53RK            |
| 68 | ALPK1              | 76 | PRKCG             |
|    |                    | 77 | PTK2B             |
|    |                    | 78 | MAP4K2            |
|    |                    | 79 | DKFZp761P0423 (?) |
|    |                    | 80 | CDK3              |

Supplementary fig. 13.

Group 3: 1-21

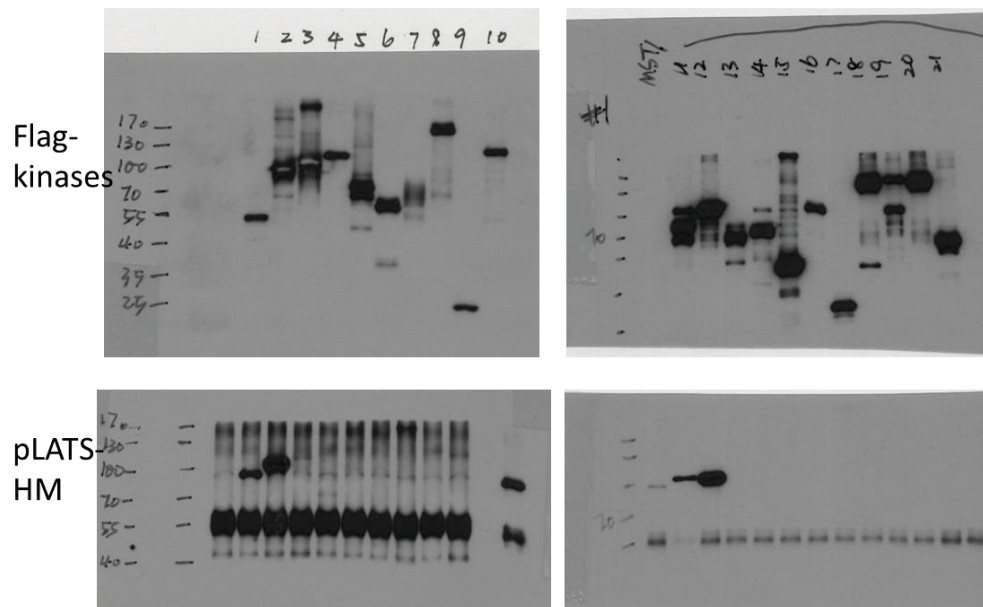

|    |              |    |         |
|----|--------------|----|---------|
| 1  | LOC653052(?) | 11 | ACVRL1  |
| 2  | PRKCI        | 12 | PRKCB1  |
| 3  | PRKCH        | 13 | SGK     |
| 4  | FES          | 14 | RPS6KL1 |
| 5  | RPS6KA4      | 15 | EPHA10  |
| 6  | PTK6         | 16 | TBK1    |
| 7  | TGFBR2       | 17 | CCRK    |
| 8  | RET          | 18 | TYRO3   |
| 9  | RIPK3        | 19 | JAK1    |
| 10 | LOC91807     | 20 | TYRO3   |
|    |              | 21 | CAMK1G  |

Group 3: 22-33

Flag-kinases

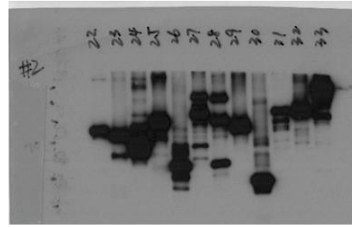

Flag-kinases  
Short exposure

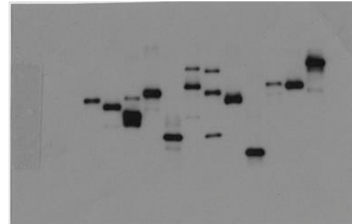

pLATS-HM

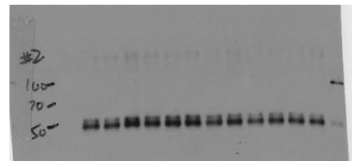

- 22 RPS6KA5 (isoform 2)
- 23 ADCK1 (isoform 2)
- 24 TSSK1
- 25 LIMK1
- 26 PRKACG
- 27 EPHB1
- 28 DSTYK (isoform 1)
- 29 FGR
- 30 CDK10 (isoform 3)
- 31 PAK6
- 32 PRKCZ
- 33 ROR2

Group 2: 45-48

Group 3: 34-40

Group 3: 41-53

Flag-kinases

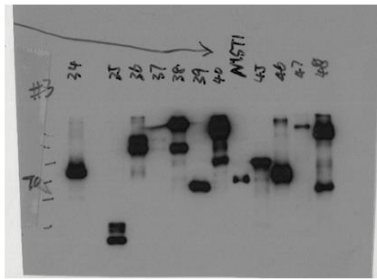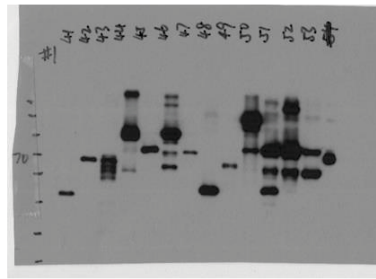

pLATS-HM

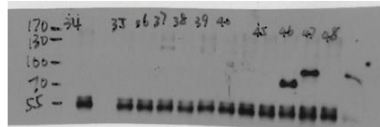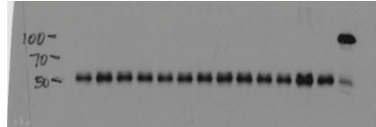

Group 2

45 MYLK2  
46 RIPK2  
47 MAP4K4  
48 FLT3

Group 3

34 IRAK3  
35 TSSK4 (isoform 3)  
36 EPHA1  
37 STK32A  
38 IGF1R  
39 DAPK3  
40 PDGFRB

Group 3

41 CDK4  
42 EPHA3  
43 CAMK2B (isoform 2)  
44 BMX  
45 PRKAA2  
46 PFTK1  
47 DYRK2 (isoform 2)  
48 AURKC  
49 MGC42105  
50 NTRK2  
51 CSNK1A1L  
52 AKT1  
53 UHMK1

Group 3: 54-70

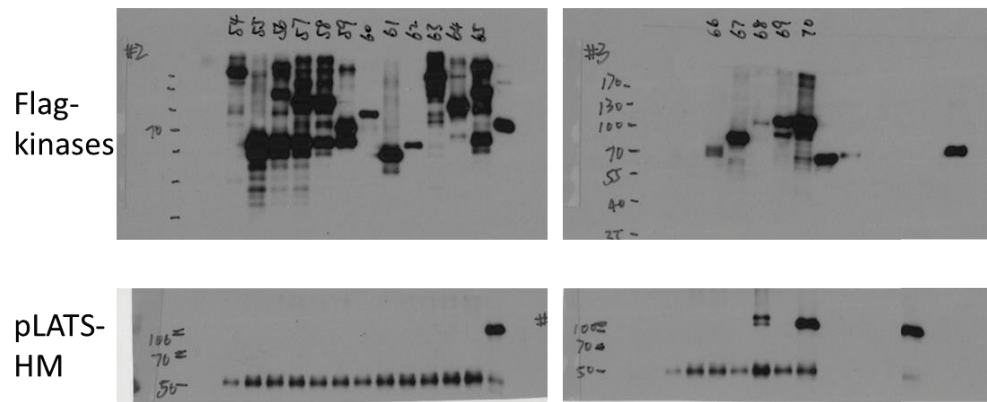

- 54 PASK
- 55 PDPK1 (isoform 4)
- 56 PHKG2
- 57 EPHA4
- 58 ADRBK1
- 59 ZAK (isoform 2, or beta)
- 60 PAK4 (isoform 1)
- 61 LOC91461
- 62 STRADB
- 63 DAPK1
- 64 PLK3
- 65 PDGFRA
- 66 TGFBR1
- 67 SGK3
- 68 EIF2AK1
- 69 MAP3K7 (isoform 1A)
- 70 PRKCA

Group 3: 71-82

Flag-kinases

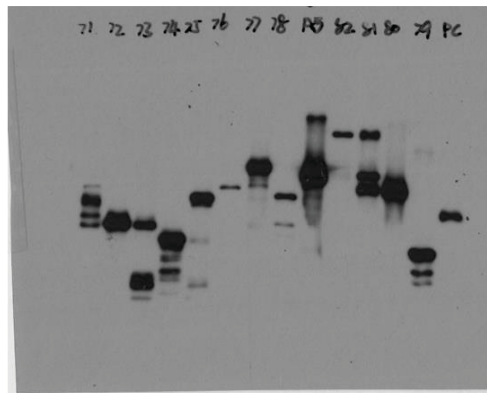

pLATS-HM

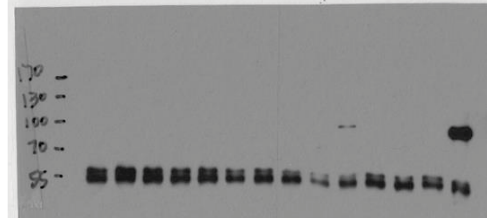

- |    |           |
|----|-----------|
| 71 | BMPR1B    |
| 72 | PTK6      |
| 73 | LOC340371 |
| 74 | TRIB3     |
| 75 | STK38L    |
| 76 | ULK4      |
| 77 | SIK1      |
| 78 | PCK2      |
| 79 | AURKB     |
| 80 | GRK6A     |
| 81 | EGFR      |
| 82 | MINK1     |

## Supplementary fig. 14.

Group 4: 1-25

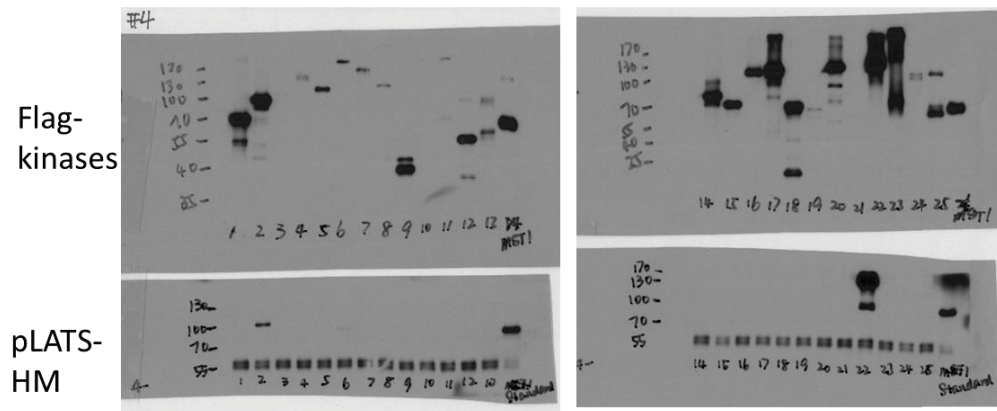

|    |                 |    |                   |
|----|-----------------|----|-------------------|
| 1  | AKT2            | 14 | DYRK2 (isoform 1) |
| 2  | RPS6KA1         | 15 | PAK2              |
| 3  | HIPK2           | 16 | MAP4K3            |
| 4  | ULK2            | 17 | PRKD2             |
| 5  | SRPK1           | 18 | STK38             |
| 6  | SLK (isoform 2) | 19 | NEK10             |
| 7  | BMPR2           | 20 | PTK2              |
| 8  | PLK4            | 21 | BRAF              |
| 9  | BCKDK           | 22 | NEK9              |
| 10 | FASTKD1         | 23 | CLK2              |
| 11 | LMTK2           | 24 | MGC16169          |
| 12 | AURKA           | 25 | CHEK1             |
| 13 | ACVR2A          |    |                   |



Group 4: 26-45

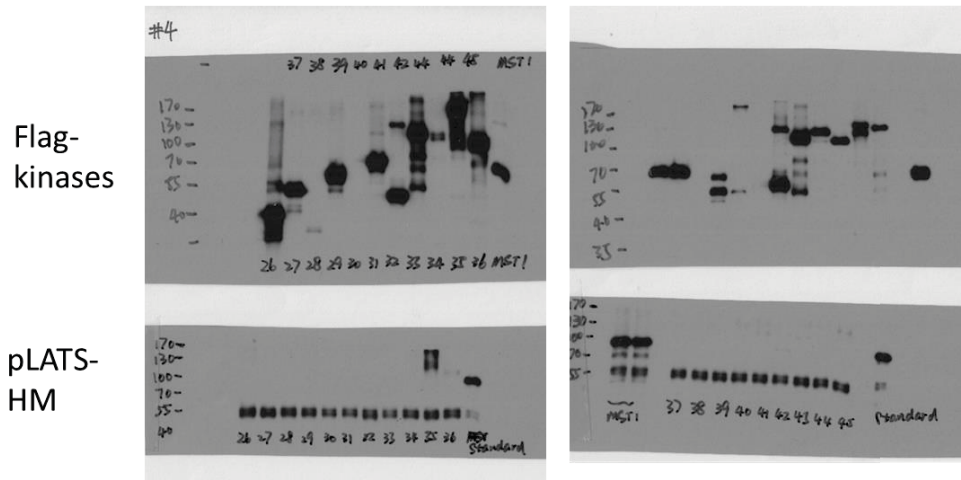

- 26 PIM1 (isoform 2)
- 27 MAPKAPK2
- 28 TSSK3
- 29 VRK1
- 30 CDKL4
- 31 CDC2L6
- 32 DAPK2
- 33 MAP4K1 (isoform 2)
- 34 SNRK
- 35 ERBB4
- 36 BMX
- 37 FASTK (isoform 2)
- 38 ALPK2
- 39 DYRK3 (isoform 2, short)
- 40 ERN1
- 41 RPS6KC1
- 42 TAOK3
- 43 MAP4K5
- 44 MAST1
- 45 BUB1B

Group 4: 46-70

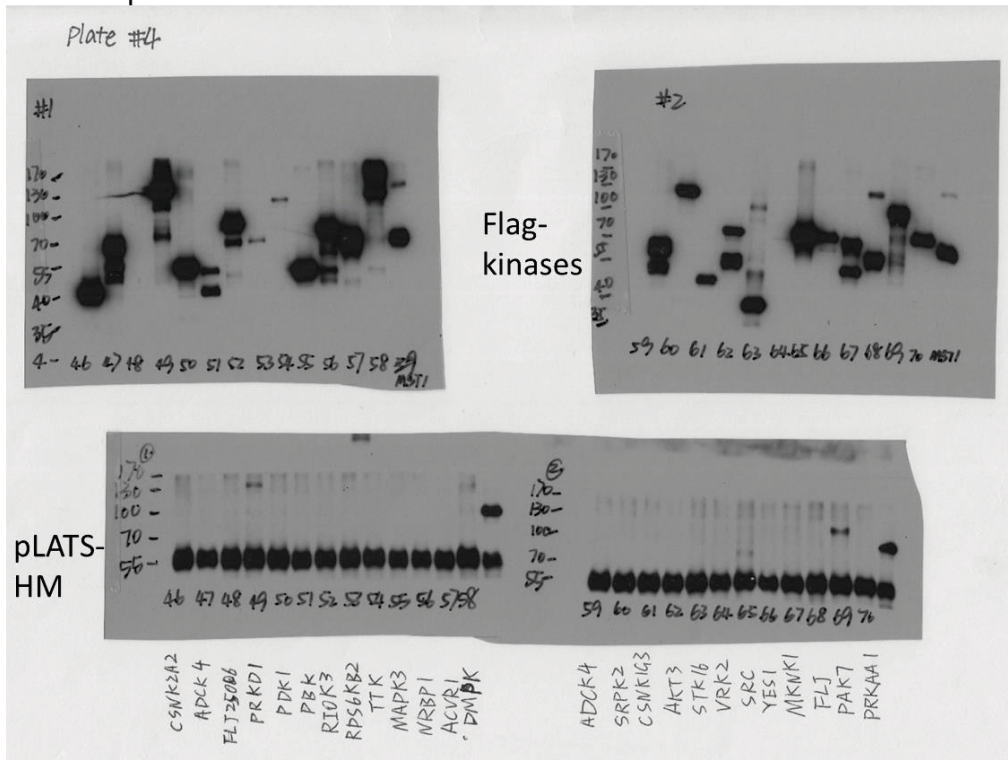

|    |                   |    |                          |
|----|-------------------|----|--------------------------|
| 46 | CSNK2A2           | 59 | ADCK4 (isoform 2)        |
| 47 | ADCK4 (isoform 1) | 60 | SRPK2                    |
| 48 | FLJ25006          | 61 | CSNK1G3 (isoform 3 or 4) |
| 49 | PRKD1             | 62 | AKT3 (isoform 1)         |
| 50 | PDK1              | 63 | STK16                    |
| 51 | PBK               | 64 | VRK2                     |
| 52 | RIOK3             | 65 | SRC                      |
| 53 | RPS6KB2           | 66 | YES1                     |
| 54 | TTK               | 67 | MKNK1                    |
| 55 | MAPK3             | 68 | FLJ23356                 |
| 56 | NRBP1             | 69 | PAK7                     |
| 57 | ACVR1             | 70 | PRKAA1                   |
| 58 | DMPK              |    |                          |

Supplementary fig. 15.

Group 4: 71-75

Group 5: 1-17

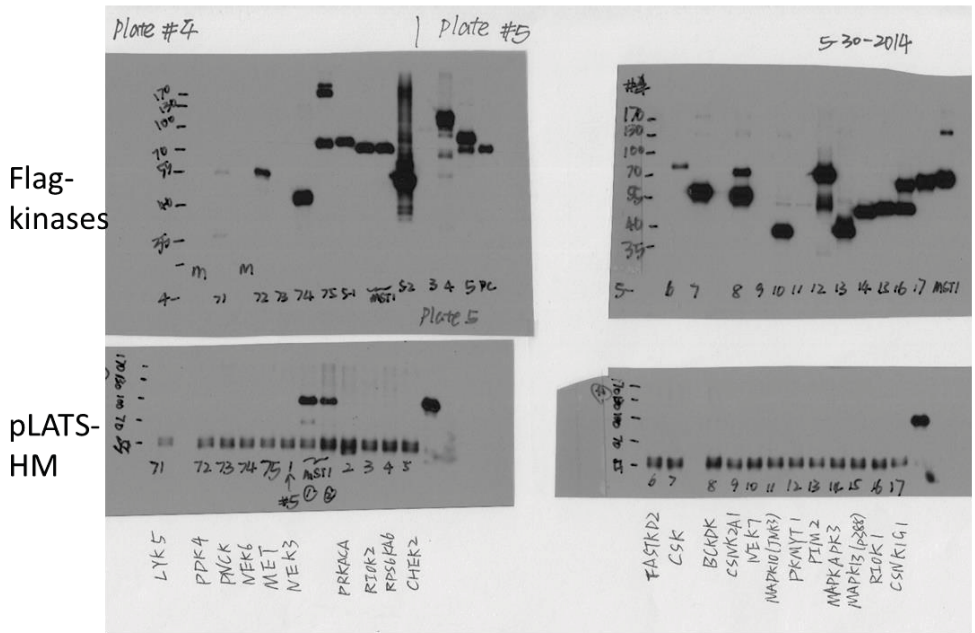

Group 4

71 LYK5  
72 PDK4  
73 PNCK  
74 NEK6  
75 MET

Group 5

1 MAPK14  
2 NEK3  
3 PRKACA  
4 RIOK2  
5 RPS6KA6  
6 CHEK2  
7 FASTKD2  
8 CSK  
9 BCKDK  
10 CSNK2A1  
11 NEK7  
12 MAPK10  
13 PKMYT1  
14 PIM2  
15 MAPKAPK3  
16 MAPK13  
17 RIOK1

Group 5: 18-42

Flag-kinases

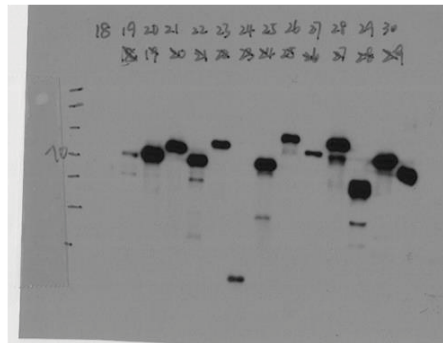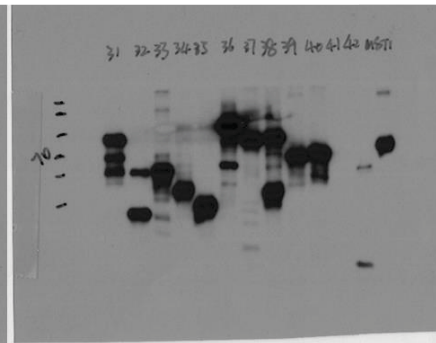

pLATS-HM

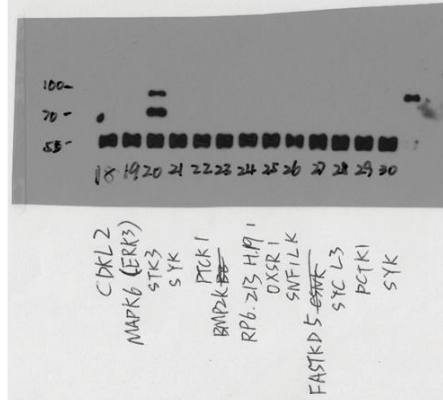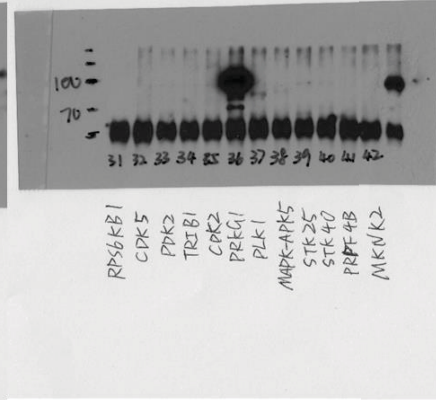

|    |                   |    |                      |
|----|-------------------|----|----------------------|
| 18 | CSNK1G1           | 31 | RPS6KB1              |
| 19 | MAPK6             | 32 | CDK5                 |
| 20 | STK3              | 33 | PDK2                 |
| 21 | SYK               | 34 | TRIB1                |
| 22 | PCTK1             | 35 | CDK2                 |
| 23 | BMP2K (isoform 2) | 36 | PRKG1                |
| 24 | RP6-213H19.1      | 37 | PLK1                 |
| 25 | OXSR1             | 38 | MAPKAPK5 (isoform 2) |
| 26 | SNF1LK            | 39 | STK25                |
| 27 | FASTKD5           | 40 | STK40                |
| 28 | SCYL3 (isoform 2) | 41 | PRPF4B               |
| 29 | PCTK1             | 42 | MKNK2                |
| 30 | SYK               |    |                      |

Group 5: 43-62, 69

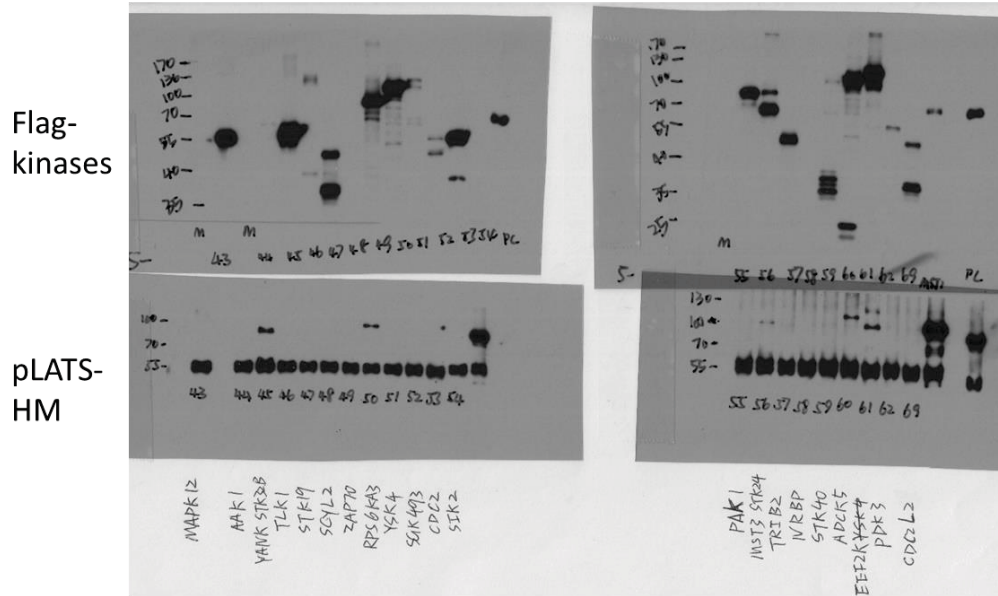

|    |                  |    |                   |
|----|------------------|----|-------------------|
| 43 | MAPK12           | 54 | SIK2              |
| 44 | AAK1             | 55 | PAK1              |
| 45 | STK32B           | 56 | STK24 (isoform A) |
| 46 | TLK1             | 57 | TRIB2             |
| 47 | STK19            | 58 | NRBP              |
| 48 | SCYL2            | 59 | STK40             |
| 49 | ZAP70            | 60 | ADCK5             |
| 50 | RPS6KA3          | 61 | EEF2K             |
| 51 | YSK4 (isoform 6) | 62 | PDK3              |
| 52 | SGK493           | 69 | CDC2L2            |
| 53 | CDC2             |    |                   |

Group 5: 63-68; 70,71

Flag-kinases

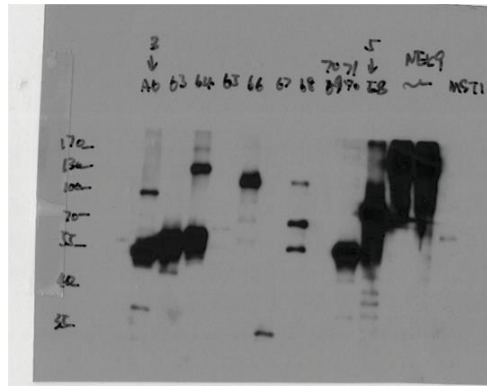

pLATS-HM

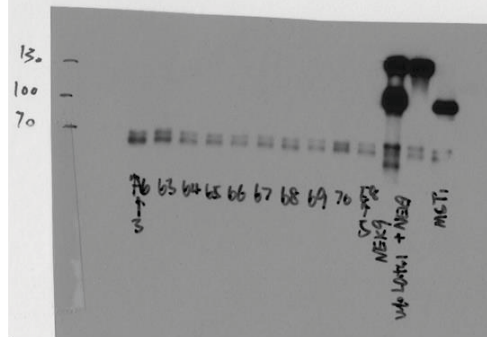

- |    |                    |
|----|--------------------|
| 63 | PXK                |
| 64 | SGK196             |
| 65 | EPHA7              |
| 66 | TLK2               |
| 67 | STRADA             |
| 68 | STK19 (isoform 2)  |
| 70 | BRSK2 (isoform 3?) |
| 71 | PAK4 (isoform 2)   |

Supplementary fig. 16.

Group 6: CAMK and CAMKK

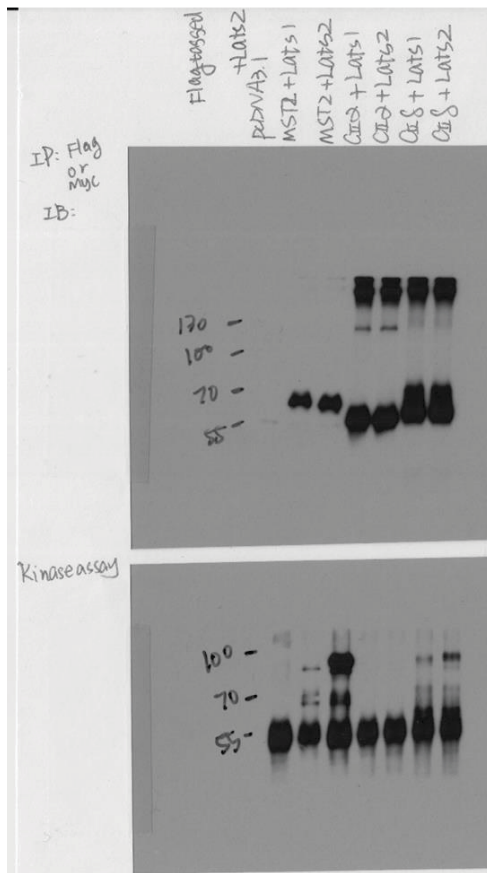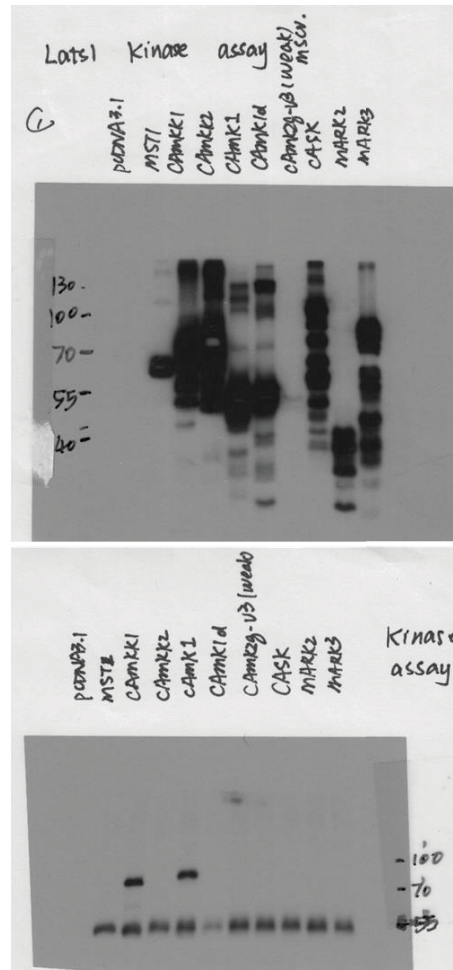

- CAMKIIA
- CAMKIID
- CAMKK1
- CAMKK2
- CAMK1
- CAMK1d
- CAMK2g-T287D
- CASK
- MARK2
- MARK3



## Supplementary fig. 17.

### Group 7: MAPKs

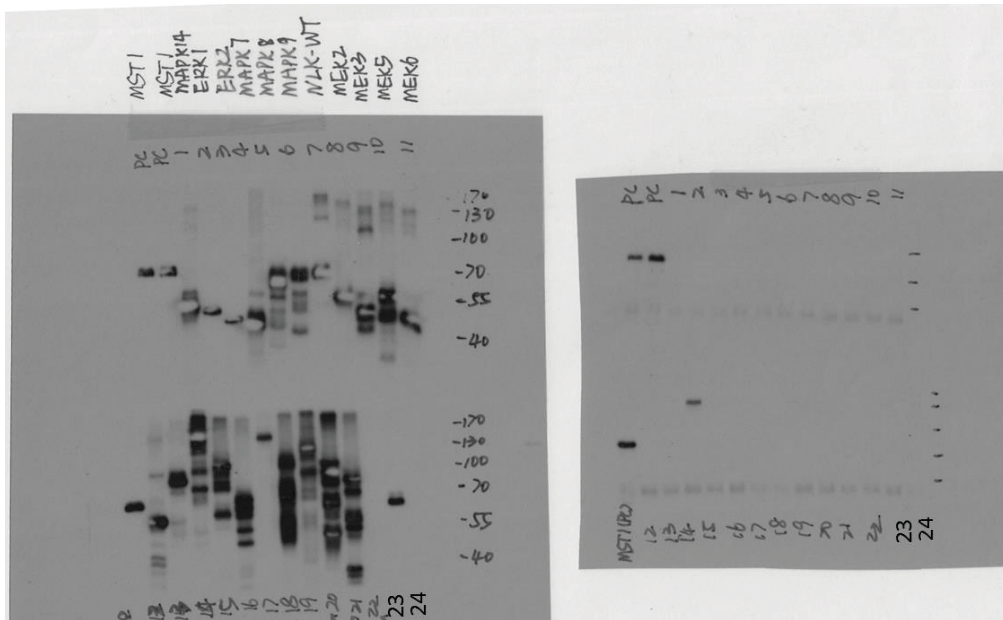

1. MAPK14-p38a
2. hERK1
3. rErk2
4. MAPK7-ERK5
5. MAPK8
6. MAPK9
7. NLK
8. MAP2K2
9. MAP2K3
10. MAP2K5
11. MAP2K6

12. MAP2K7
13. MAP3K2
14. MAP3K5
15. MAP3K6
16. MAP3K8
17. MAP3K9
18. MAP3K13
19. MAP3K14
20. MAP3K15
21. Raf-1
22. pWZL-CAMK1g
23. pWZL-CAMK2b
24. pWZL-CAMK4

## Supplementary fig. 18.

### Group 8: CKs and PKCs

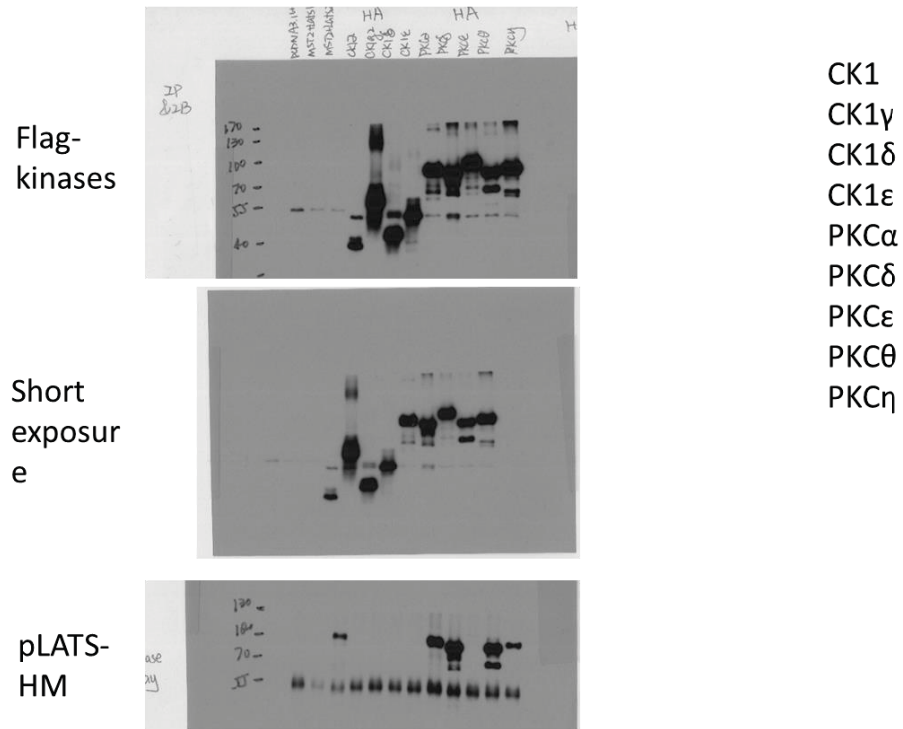

Note that the molecular weight of pLATS-HM signals is actually the same with that of the PKC kinases.

Supplementary fig. 19. Uncropped immunoblots.

Fig 1A.

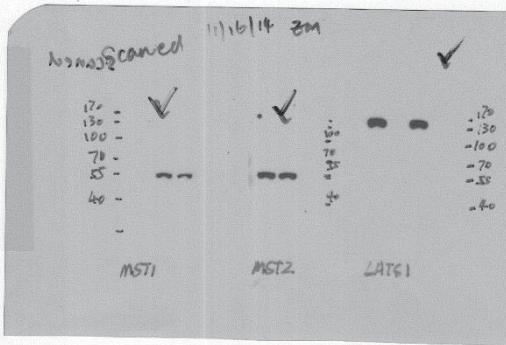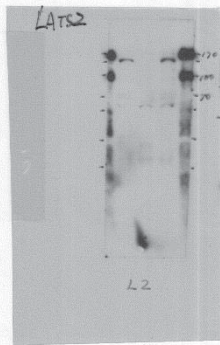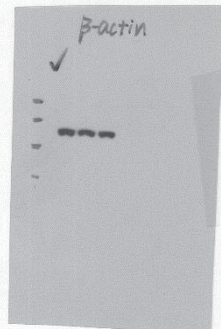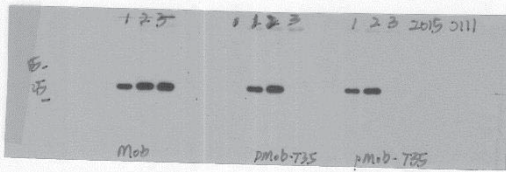

Figure 1B

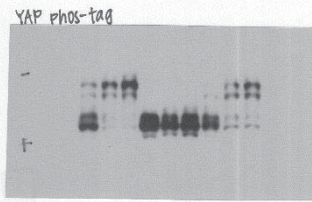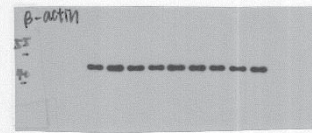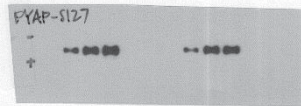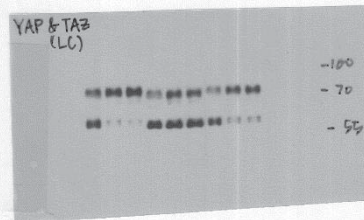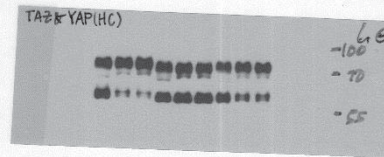

Fig. 1c.

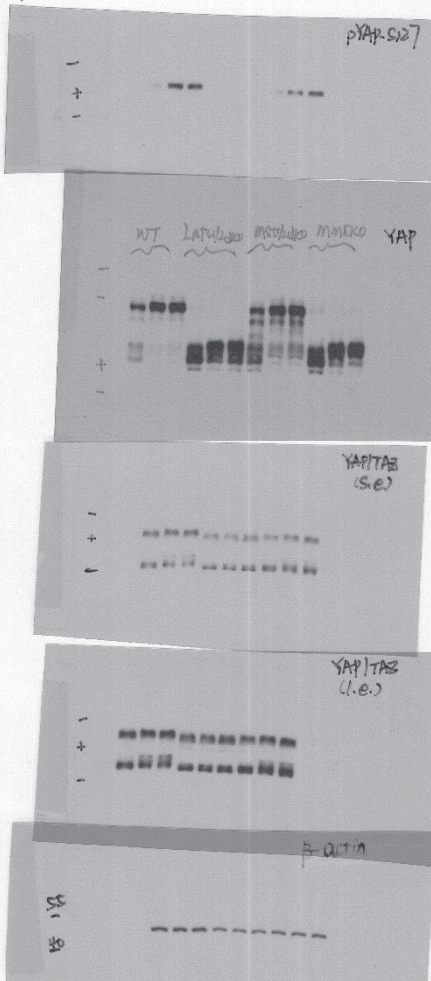

Fig. 1d / 1e

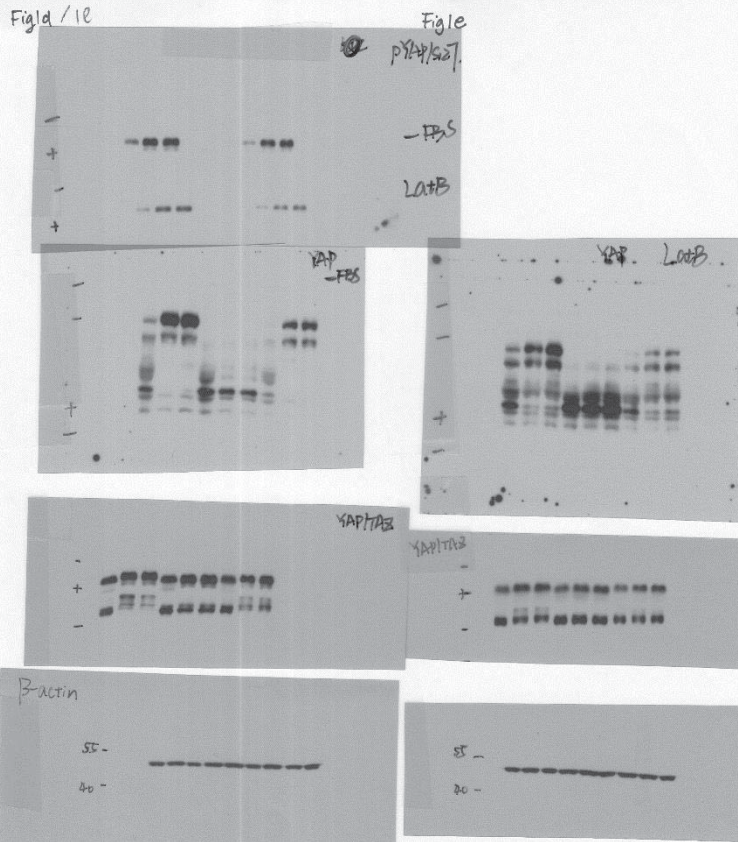



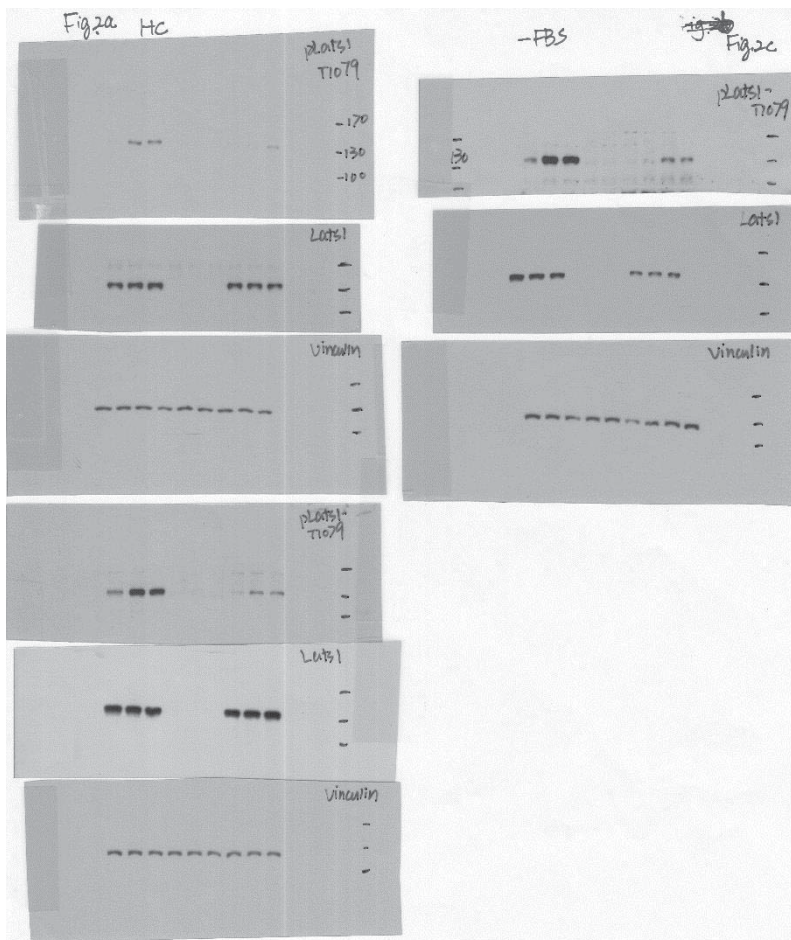

2DG Fig. 2b

Fig. 2f

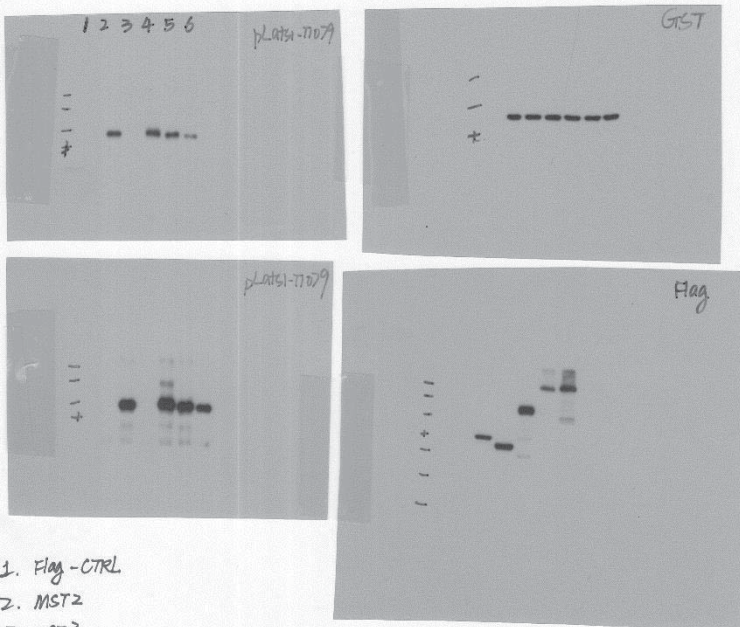

1. Flag-CTRL
2. MST2
3. MST3
4. MAP4K2
5. MAP4K4
6. MAP4K6

Fig. 2g

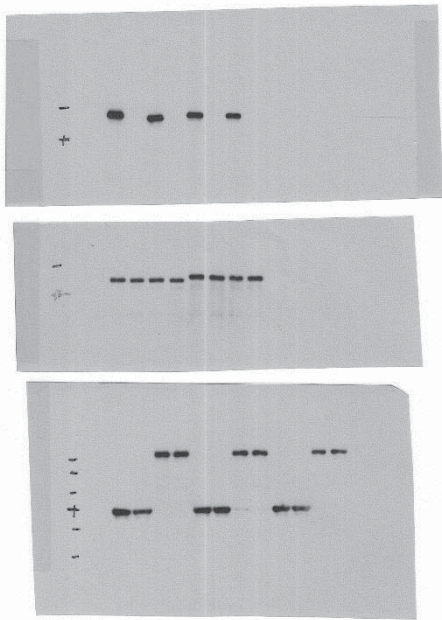

Fig. 2g

plats1-11079

GST

Flag

Fig. 2h

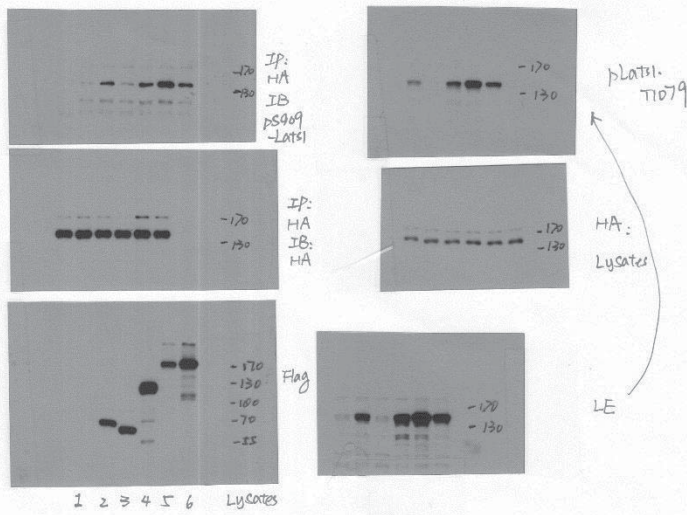

1. N-Flag
2. MST2
3. MST3
4. 4K2
5. 4K4
6. 4K6

12/3/2014

Fig. 3a

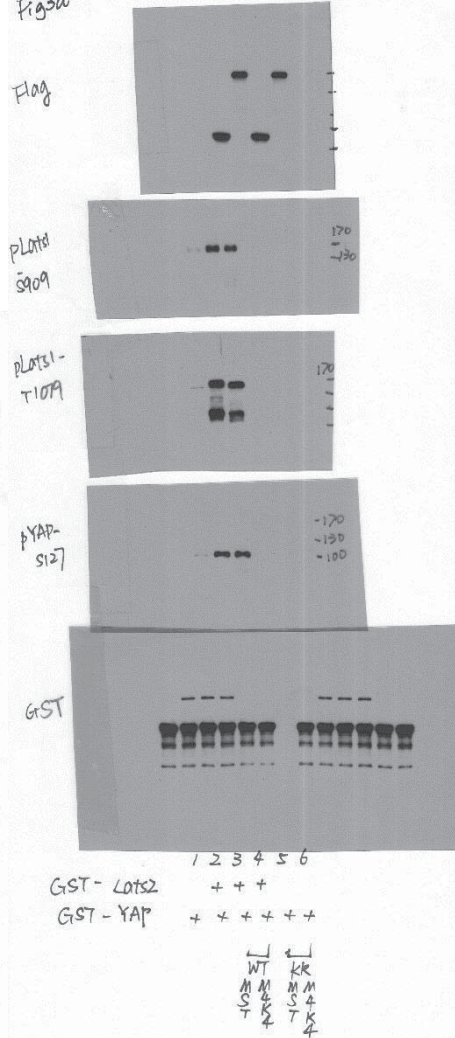

GST - LATS2 + + +  
 GST - YAP + + + + +

WT KK  
 M S  
 S T K T  
 K K



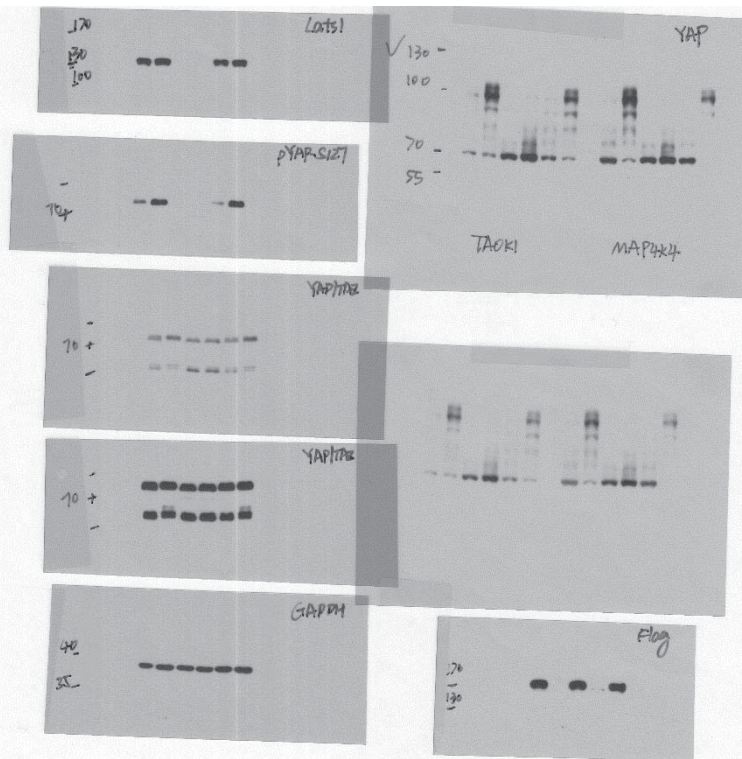

Fig 3c  
 Dox - - - + + +  
 CON WT KR CON WT KR HA

10/7/2014

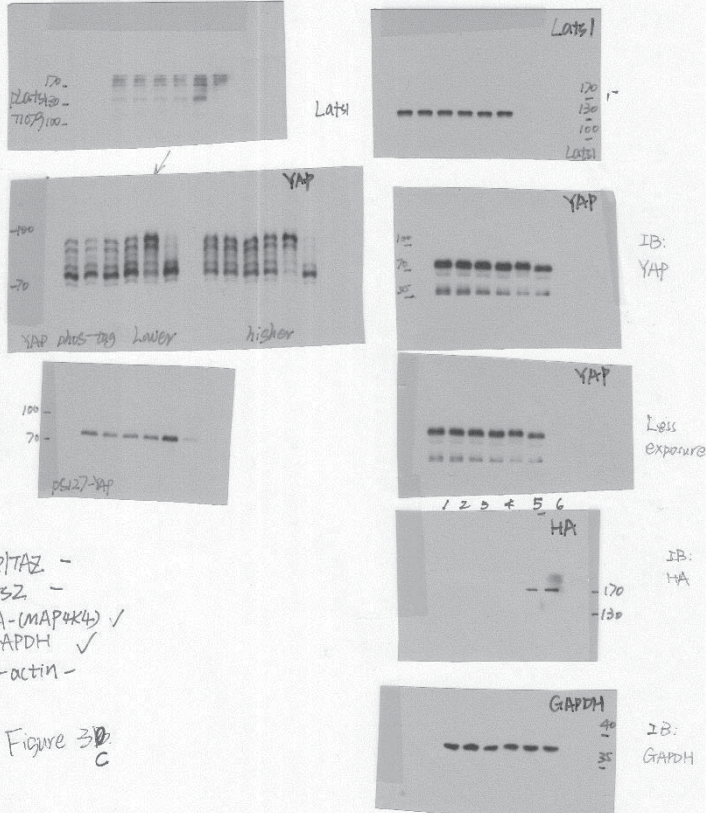

YAP172 -  
 Lats2 -  
 HA-(MAP4K4) ✓  
 GAPDH ✓  
 β-actin -

Figure 3c

Fig 3d

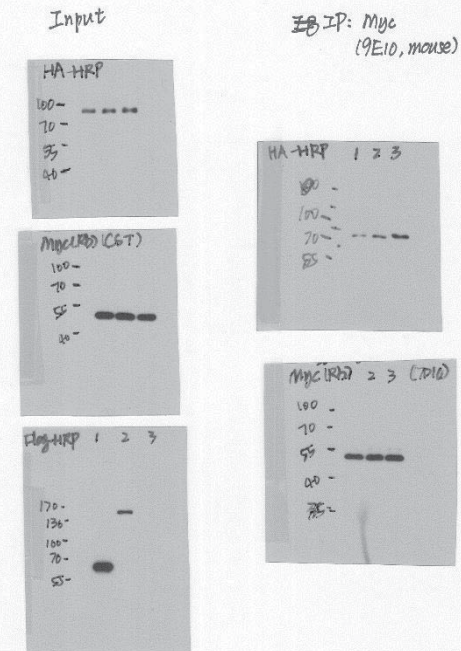

Fig. 4a

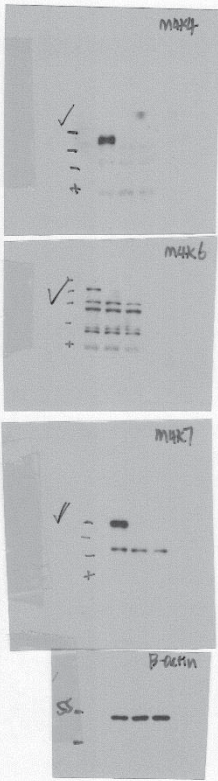

Fig. 4b

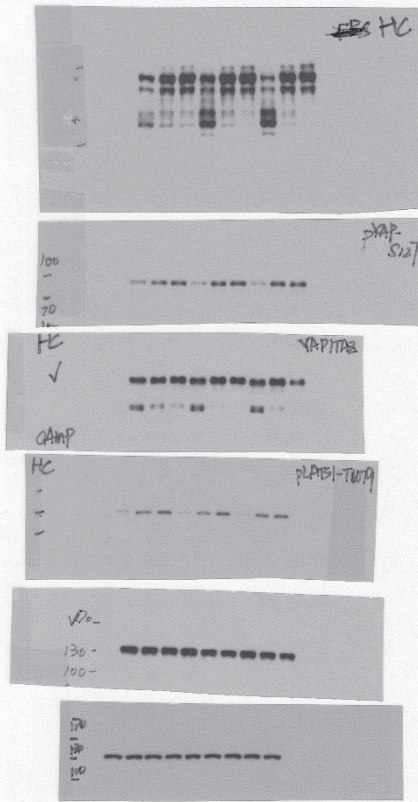

Fig. 4c

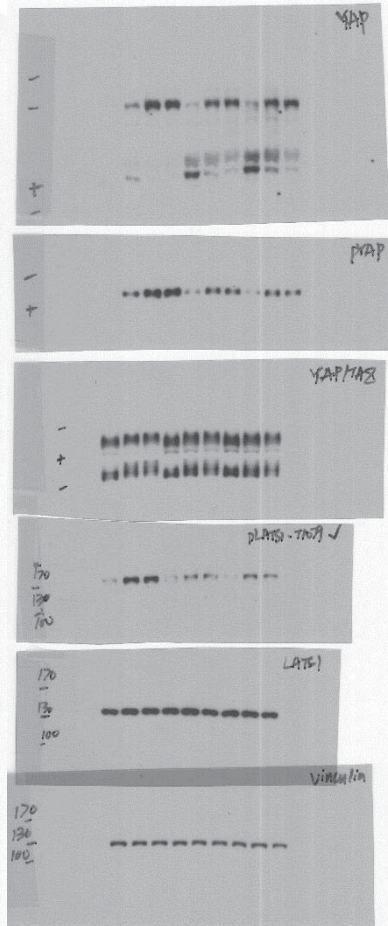



Fig. 4d

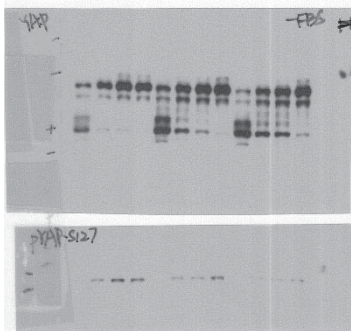

Fig. 4e

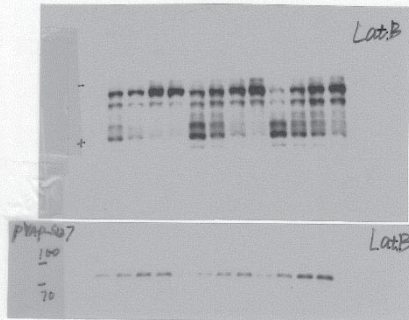

Figure 5

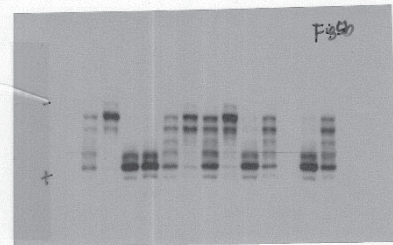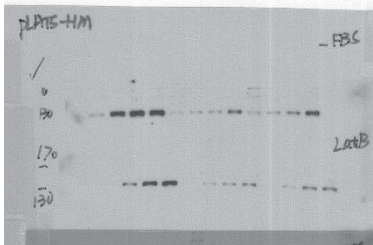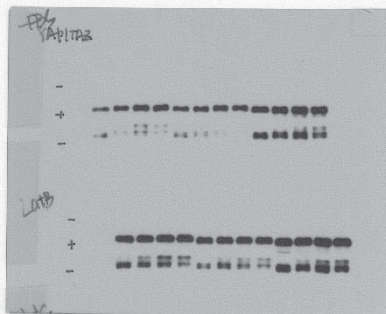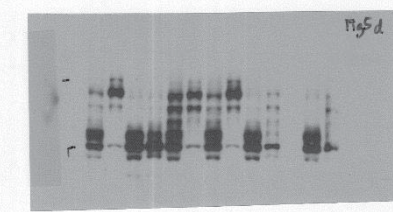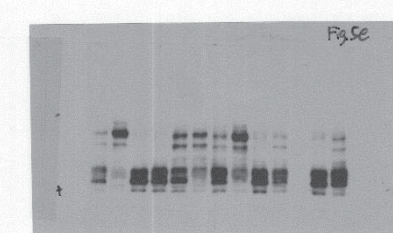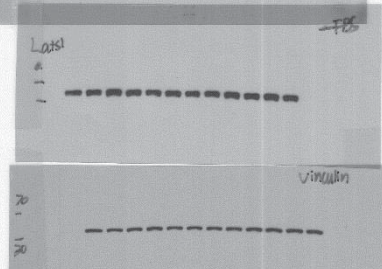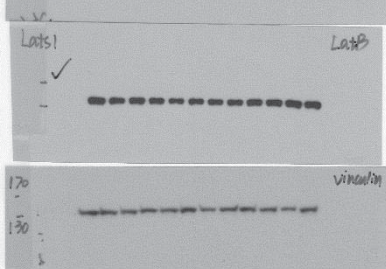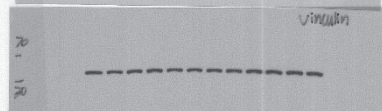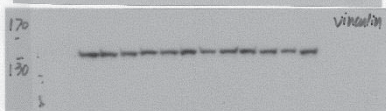



Fig 5b.

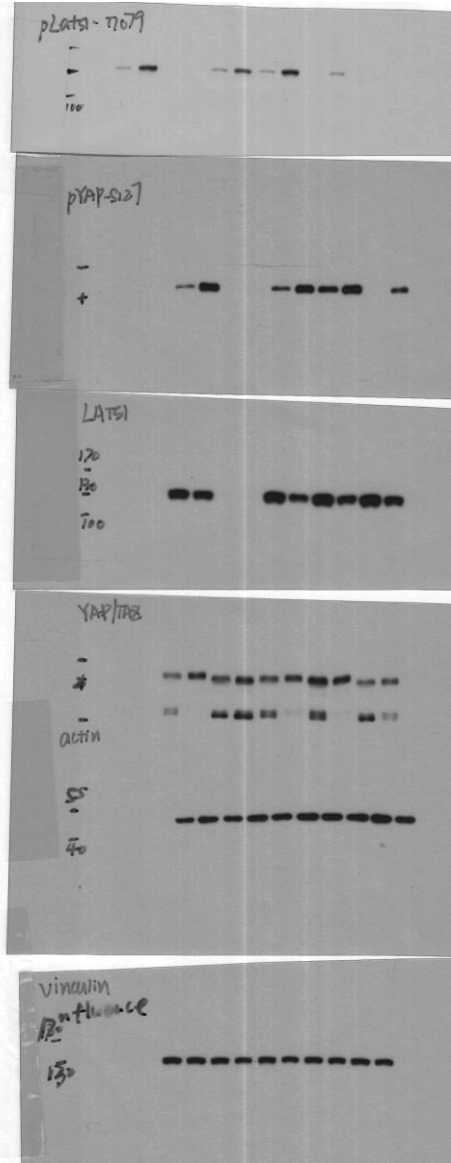



Fig 5c

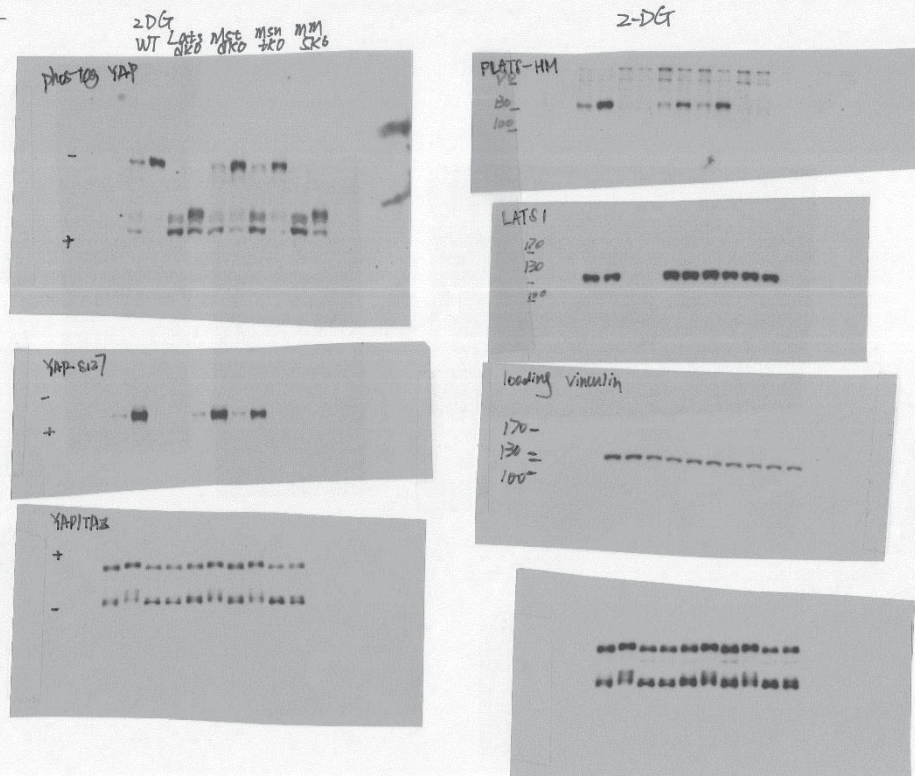

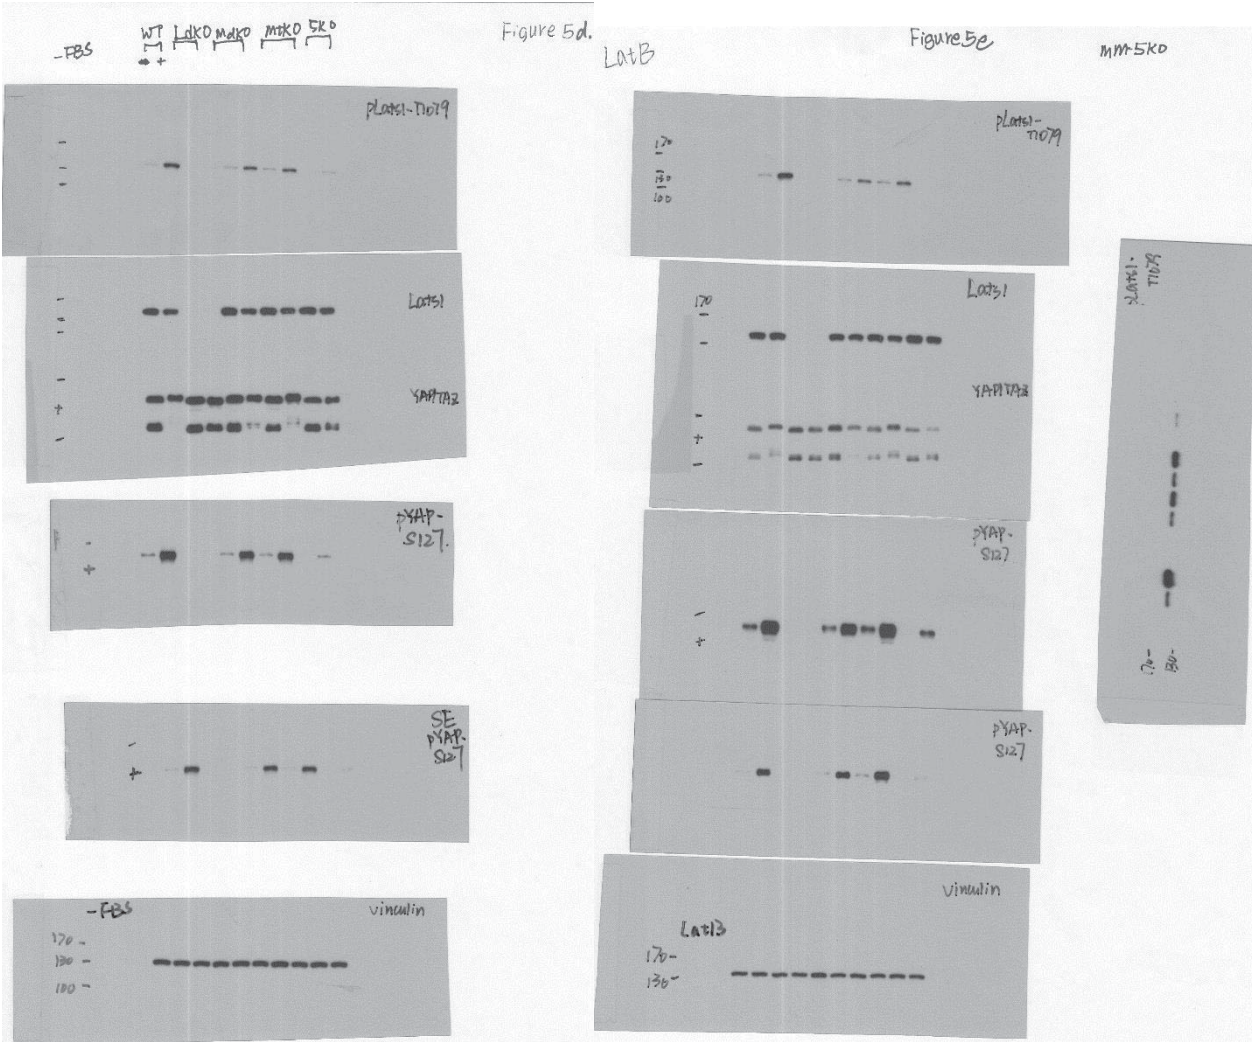



Fig. 6c & Fig. S3d

7/2/2015

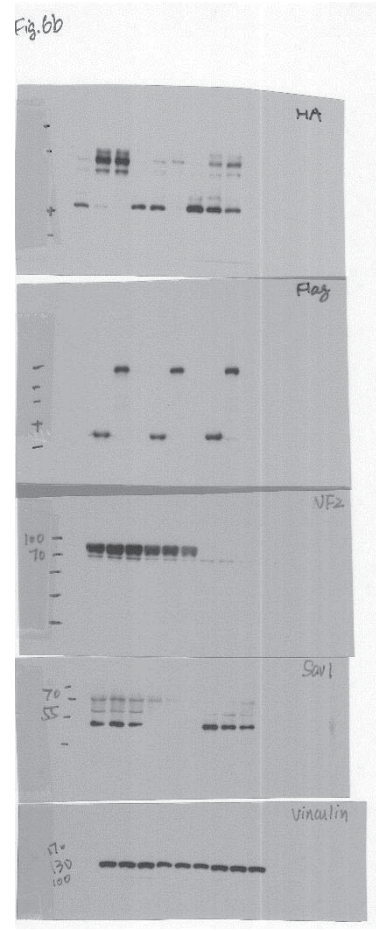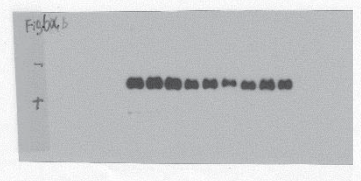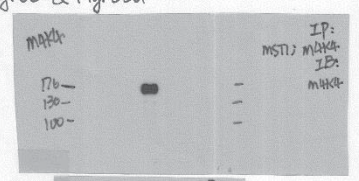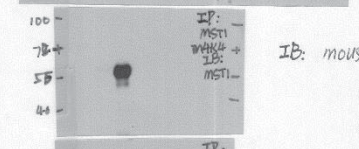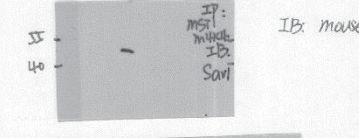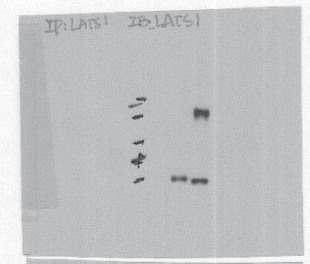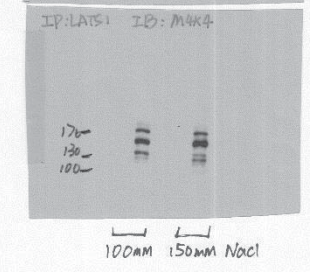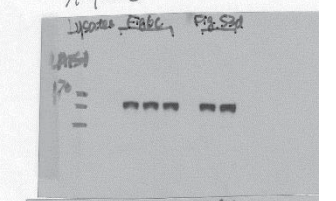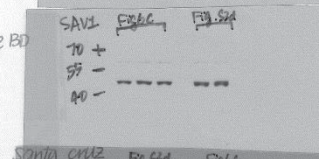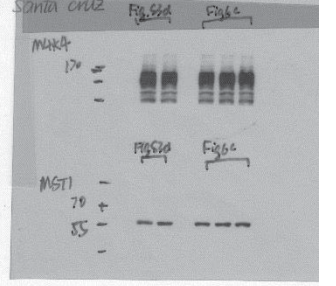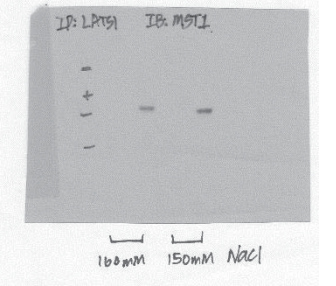

Fig. 6a

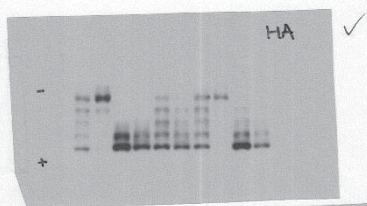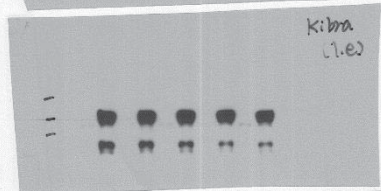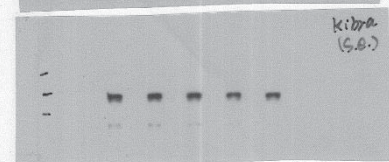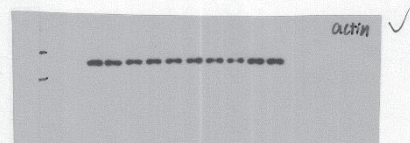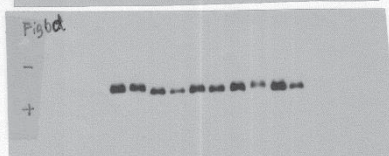

Fig. 6b

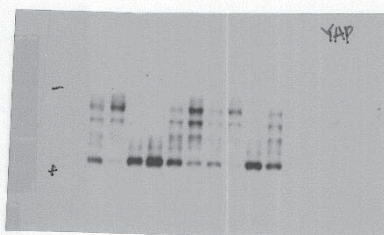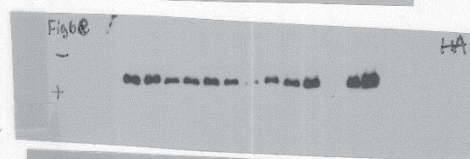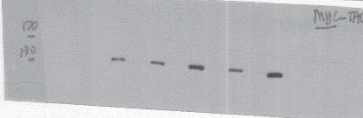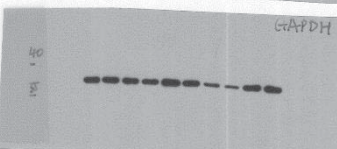

Fig. 7a

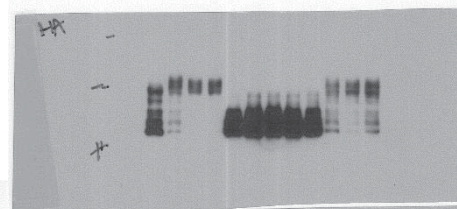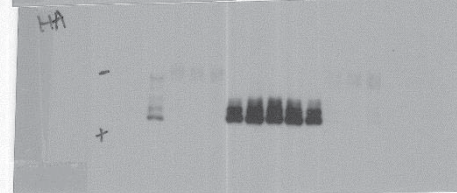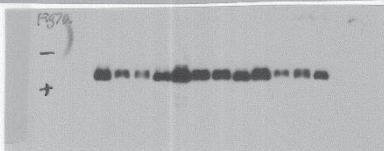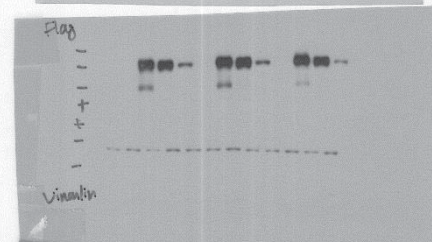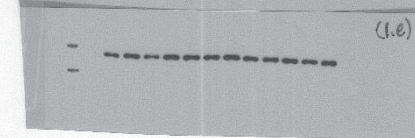



Fig. 7b & Fig. 9c.

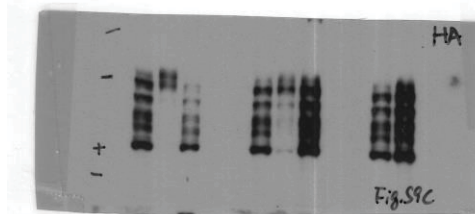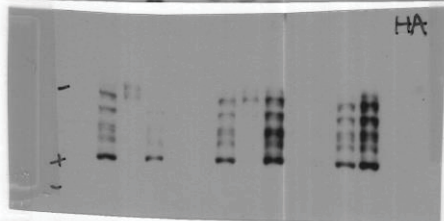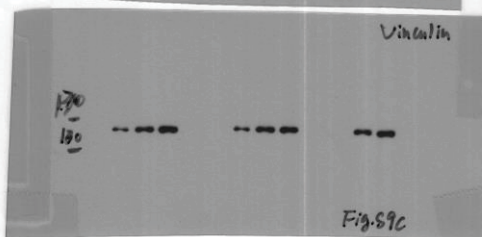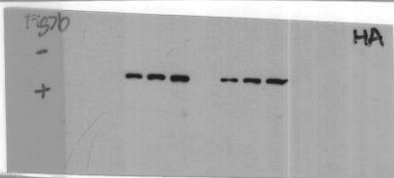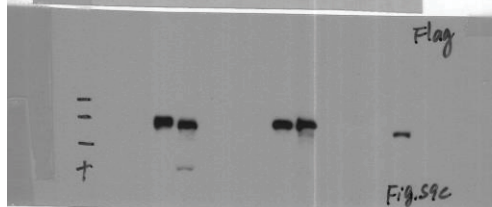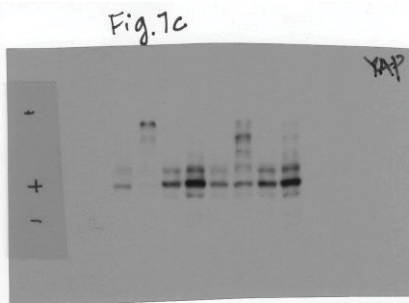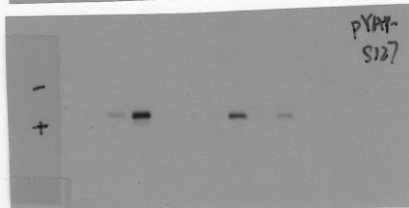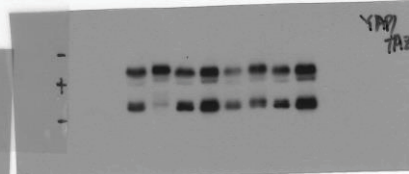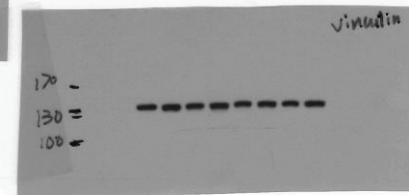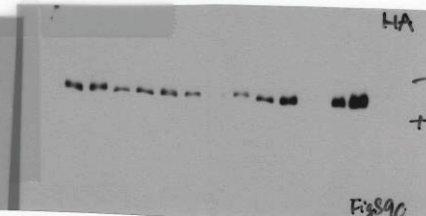



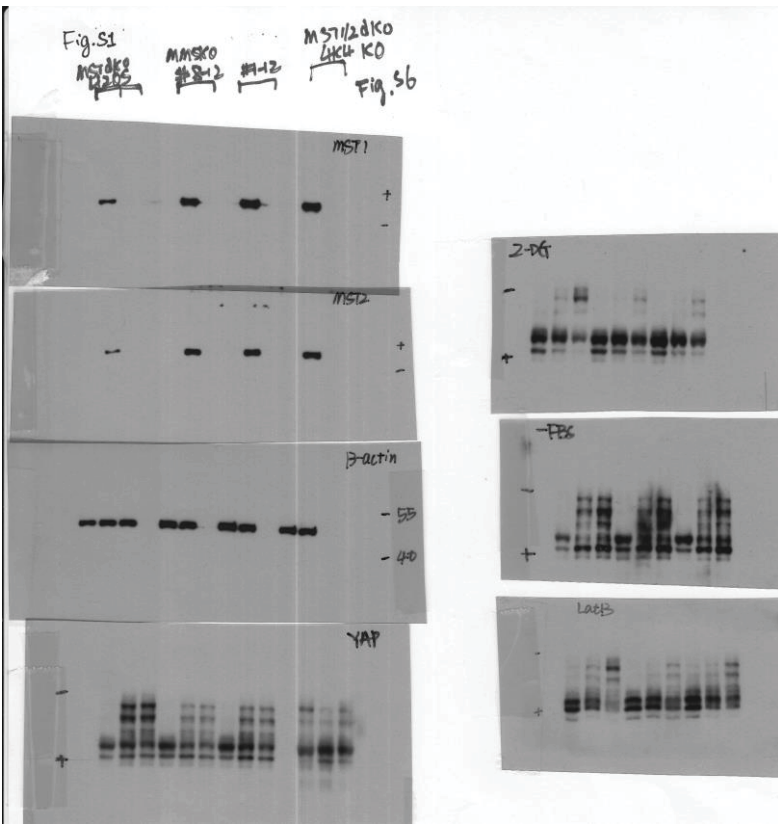

Fig.S1

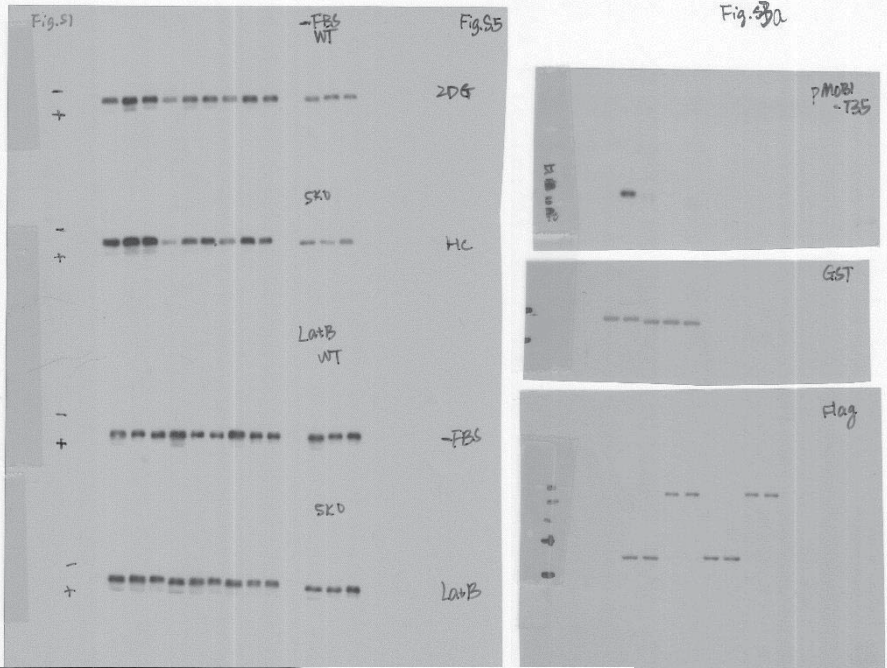

Fig S3b

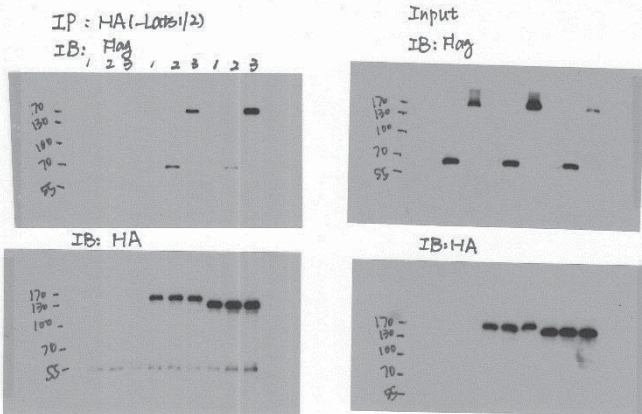

1. PRK7- N-Flag
2. MST2-Flag
3. MAP4K4-Flag

PCNA-SHA Lats1-HA Lats2-HA

Fig. S3c

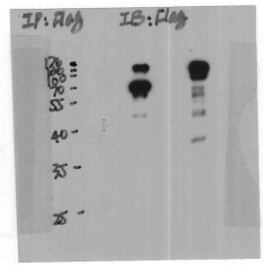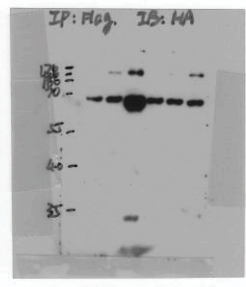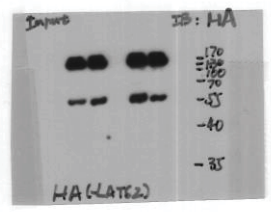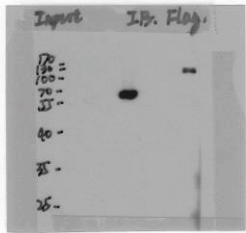

Fig. S4

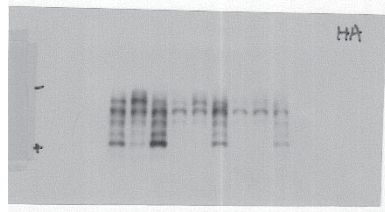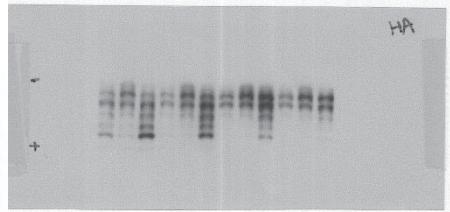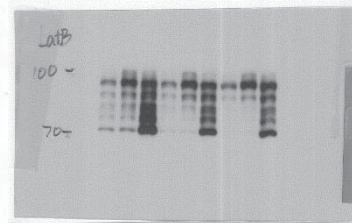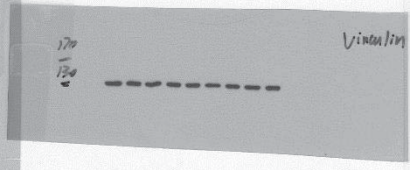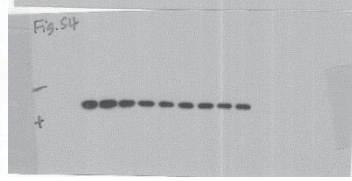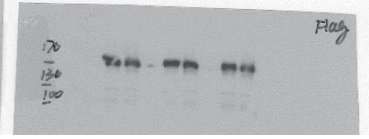



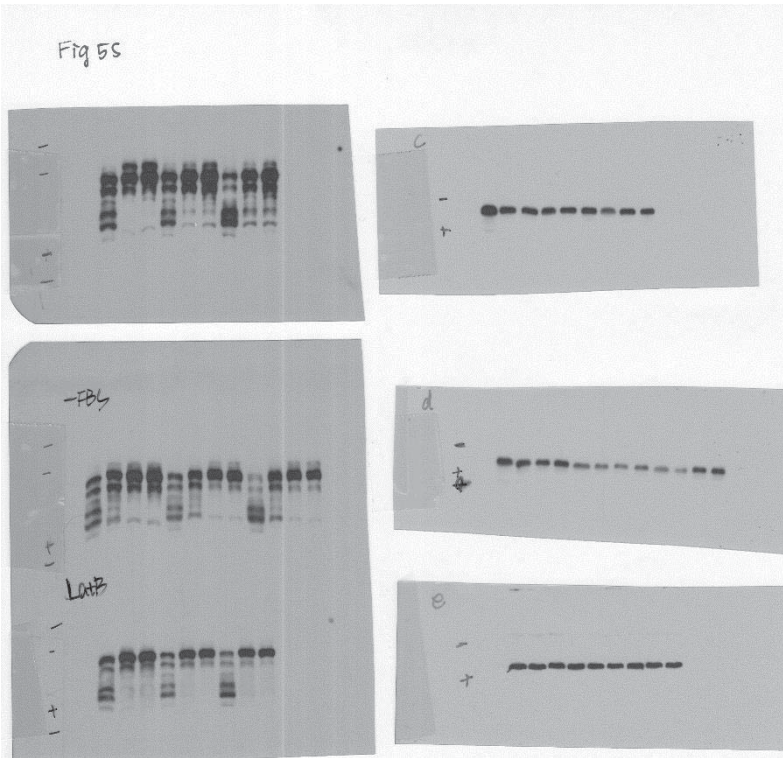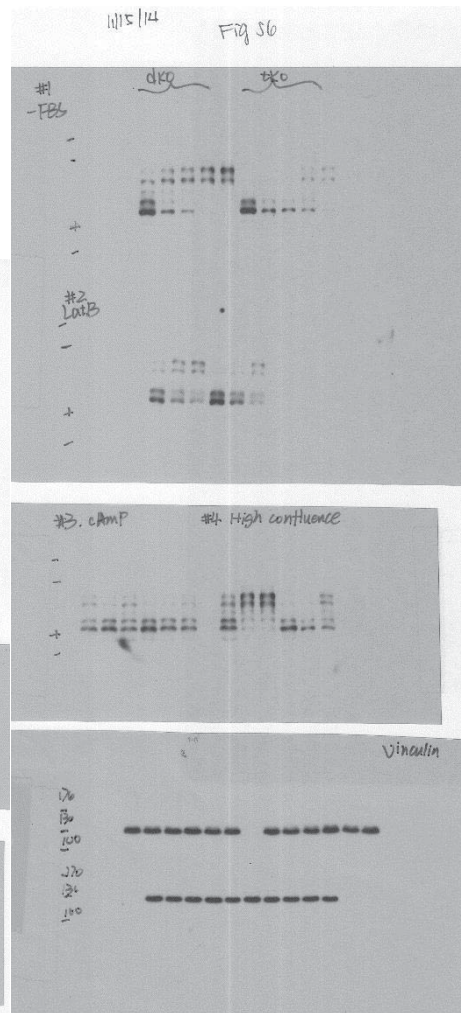

Fig 56

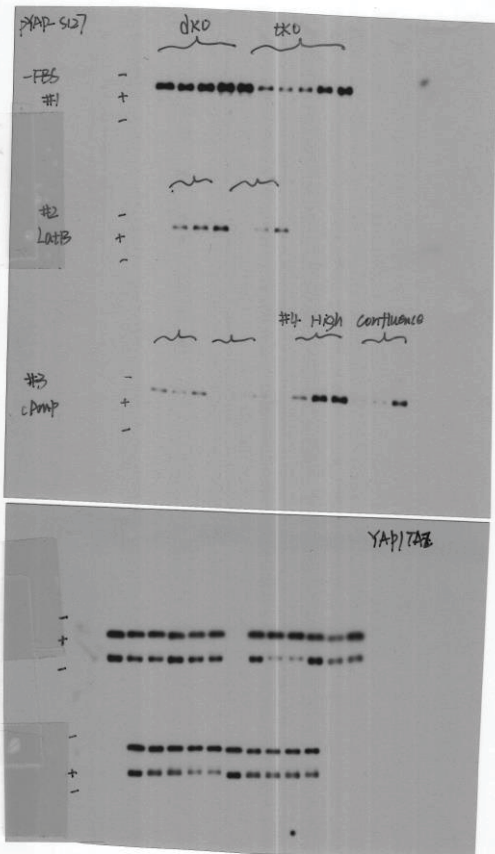

Fig 57

Fig. 57a

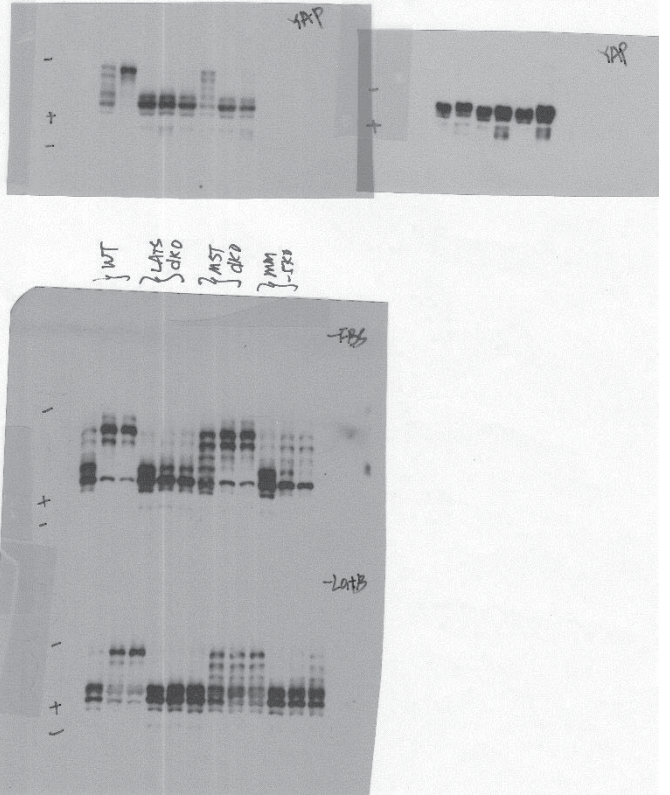





Fig. S9a/b

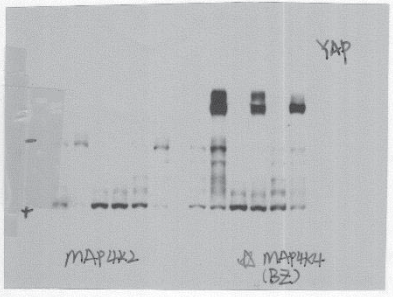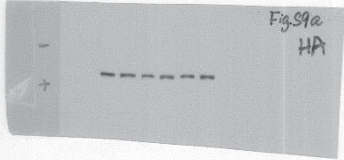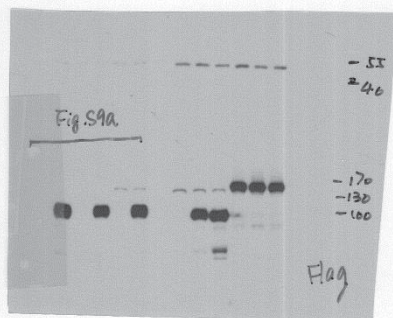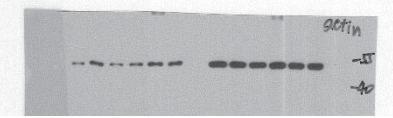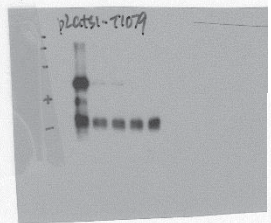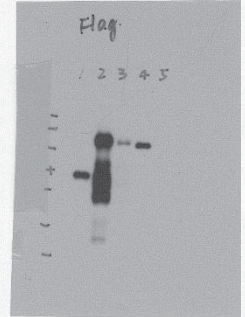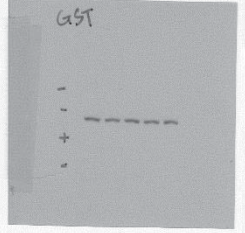

Fig. S10

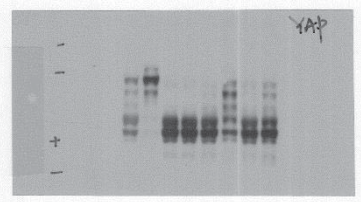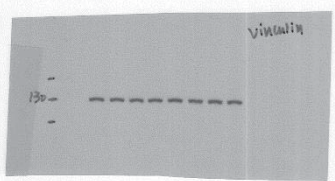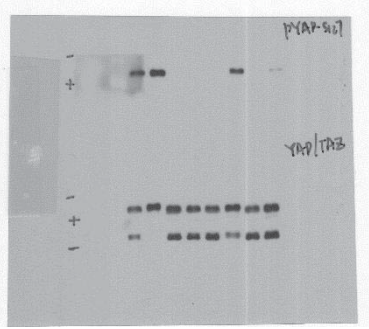

## Supplementary table. 1.

### List of sgRNA used for CRISPR

| Cell type              | Clone | Gene   | sgRNAs                |
|------------------------|-------|--------|-----------------------|
| LATS1/2 dKO HEK293A    |       | LATS1  | CGTGCAGCTCTCCGCTCTAA  |
|                        |       | LATS2  | TACGCTGGCACC GTAGCCCT |
| MST1/2 dKO HEK293A     |       | MST1   | ATACACCGAGATATCAAGGC  |
|                        |       | MST2   | AGTACTCCATAACAATCCAG  |
| MST1/2 dKO U2OS        | #1    | MST1   | AGCTTTGTATACGCTGCCAT  |
|                        |       | MST2   | TTTAATTGCGACA ACTTGAC |
|                        | #2    | MST1   | ATACACCGAGATATCAAGGC  |
|                        |       | MST2   | AGTACTCCATAACAATCCAG  |
| SAV1 KO HEK293A        |       | SAV1   | TCCAGGAGGAAGTCCTTCTC  |
| NF2 KO HEK293A         |       | NF2    | GTCCATGGTGACGATCCTCA  |
| MAP4K4 KO HEK293A      | #1    | MAP4K4 | CAGGACATGATGACCAACTC  |
|                        | #2    | MAP4K4 | GGGCGGAGAAATACGTTTCAT |
| MAP4K4/6/7 tKO HEK293A | #1    | MAP4K4 | GGGCGGAGAAATACGTTTCAT |
|                        |       | MAP4K6 | CGGACAGGTCGATGTCGTCC  |
|                        |       | MAP4K7 | CGACTCCCCGGCTCGAAGCC  |
|                        | #2    | MAP4K4 | GGGCGGAGAAATACGTTTCAT |
|                        |       | MAP4K6 | AGGGTCGGCATGTCAAGACG  |
|                        |       | MAP4K7 | CGACTCCCCGGCTCGAAGCC  |
| MST1/2-MAP4K4/6/7 5KO  | #1    | MST1   | ATACACCGAGATATCAAGGC  |
|                        |       | MST2   | AGTACTCCATAACAATCCAG  |
|                        |       | MAP4K4 | GGGCGGAGAAATACGTTTCAT |
|                        |       | MAP4K6 | CGGCAATGGAACCTACGGAC  |
|                        |       | MAP4K7 | CGACTCCCCGGCTCGAAGCC  |
|                        | #2    | MST1   | ATACACCGAGATATCAAGGC  |
|                        |       | MST2   | AGTACTCCATAACAATCCAG  |
|                        |       | MAP4K4 | CAGGACATGATGACCAACTC  |
|                        |       | MAP4K6 | AGGGTCGGCATGTCAAGACG  |
|                        |       | MAP4K7 | TTCATCCAGGCTTCGAGCCG  |



## Supplementary table 2.

### List of antibodies

| Gene              | Vendor         | Catalog #  | Used for CRISPR | Dilution for Western blot |
|-------------------|----------------|------------|-----------------|---------------------------|
| LATS1             | Cell signaling | 3477       | Yes             | 1:2000                    |
| LATS2             | Cell signaling | 5888       | Yes             | 1:1000                    |
|                   | Abcam          | ab70565    | Yes             | 1:1000                    |
| MST1              | Cell signaling | 3682       | Yes             | 1:2000                    |
|                   | BD Biosciences | 611052     | Yes             | 1:2000                    |
| MST2              | Abcam          | ab52641    | Yes             | 1:2000                    |
| MAP4K4            | Cell signaling | 5146       | Yes             | 1:1000                    |
|                   | Bethy          | A301-502A  | Yes             | 1:2000                    |
| MAP4K6            | Bethy          | A302-191A  | Yes             | 1:2000                    |
|                   | Abcam          | ab86385    | Yes             | 1:1000                    |
| MAP4K7            | Santa Cruz     | ab95887    | Yes             | 1:1000                    |
|                   | Bethy          | A310-985A  | Yes             | 1:1000                    |
| NF2               | Cell signaling | 12888      | Yes             | 1:2000                    |
| SAV1              | Cell signaling | 13301      | Yes             | 1:2000                    |
|                   | Santa Cruz     | sc-374366  |                 | 1:1000                    |
| pLATS1-T1079 (HM) | Cell signaling | 8654       |                 | 1:1000                    |
| pLATS1-S909 (AL)  | Cell signaling | 9157       |                 | 1:1000                    |
| YAP               | Abcam          | ab52771    |                 | 1:2000                    |
| YAP/TAZ           | Santa Cruz     | sc-101199  |                 | 1:1000                    |
| pYAP-S127         | Cell signaling | 4911       |                 | 1:2000                    |
| MOB1              | Cell signaling | 13730      |                 | 1:1000                    |
| pMOB1-T35         | Cell signaling | 8699       |                 | 1:1000                    |
| Actin             | Sigma          | A5441      |                 | 1:5000                    |
| Vinculin          | Sigma          | V9131      |                 | 1:5000                    |
| Flag-HRP          | Sigma          | A8592      |                 | 1:5000                    |
| Flag              | Sigma          | F1804      |                 | 1:2000                    |
| HA-HRP            | Cell signaling | 2999       |                 | 1:5000                    |
| HA                | Covance        | MMS-101P   |                 | 1:2000                    |
| GST               | Sigma          | SAB4200237 |                 | 1:2000                    |
|                   | Cell signaling | 2625       |                 | 1:1000                    |
| Myc               | Santa Cruz     | sc-40      |                 | 1:250                     |
|                   | Cell signaling | 2278       |                 | 1:1000                    |
| KIBRA             | Cell signaling | 8774       |                 | 1:2000                    |
| GAPDH             | Cell signaling | 5174       |                 | 1:2000                    |
